# Supplementary material for: Physical determinants of vesicle mobility and supply at a central synapse
Source: eLife. 2016 Aug 19;5:e15133. doi: 10.7554/eLife.15133 (PMC5025287; doi:10.7554/eLife.15133)
Supplement: Figure 2—source data 1. — DOI: http://dx.doi.org/10.7554/eLife.15133.005 [file elife-15133-fig2-data1.xlsx]

## Sheet: FRAP
"Physical determinants of vesicle mobility and supply at a central synapse"
Rothman et al. 2016
Figures 1D, 2A, 2B
Source data
Title: Average FRAP curves for single MFTs for various conditions
Each column is the average flourescence for a single MFT computed from multiple FRAP recordings
N = number of FRAP recordings for each MFT
Bleaching pulse was at 90 ms
Each FRAP cuve was normalized to average of first 3 baseline values (f0)
Weighted averages computed via Equation (1) are NOT INCLUDED
Condition: Control 35C temperature
Pulse		MFT #
ms	COUNT	0	1	2	3	4	5	6	7	8	101	102	103	104	105	106	107	108	109	110	200	201	202	203	204	205	206	207	208	209	210	211	212	213	214	300	301	302	303	304	305	306	307	308	309	310	311	312	313
20	62	1.01042	1.06664	1.0069	0.980232	0.96124	0.990126	0.958545	1.00316	1.02038	1.00425	1.01694	0.94802	1.01424	1.00703	1.01392	1.00081	0.973087	0.976657	1.03809	0.974995	1.00088	0.997517	1.00788	1.00798	1.00217	0.994701	1.00263	0.993842	0.993967	1.01314	0.919528	1.03309	0.96963	0.97508	0.98915	1.00523	0.999531	1.00026	1.01771	1.00401	1.00613	1.00316	1.01875	1.02354	0.997792	0.990058	0.998856	1.00887
50	62	1.00304	0.920124	1.00268	0.993799	1.02824	1.06399	1.01785	1.00241	0.985478	1.00682	0.973848	0.976741	0.987832	0.998646	0.989951	0.997077	0.996548	1.00311	0.967778	1.03168	0.999837	1.00389	1.00886	0.998452	0.999917	0.950221	1.00773	1.00286	1.01119	0.987657	1.05079	0.989008	1.00786	0.985471	1.06588	0.989918	0.991708	0.958349	1.01483	0.989212	1.00501	0.987275	0.988591	0.991414	1.03322	0.974309	1.00557	1.00108
80	62	0.986541	1.01323	0.990422	1.02597	1.01052	0.945886	1.0236	0.994427	0.994137	0.988923	1.00921	1.07524	0.997928	0.994323	0.99613	1.00211	1.03037	1.02023	0.994136	0.993325	0.999284	0.998589	0.983258	0.993567	0.997916	1.05508	0.989638	1.0033	0.994842	0.999198	1.02968	0.977902	1.02251	1.03945	0.944972	1.00486	1.00876	1.04139	0.967453	1.00678	0.988857	1.00957	0.992655	0.98505	0.968992	1.03563	0.99557	0.990049
110	62	0.730065	0.774003	0.786927	0.892422	0.900274	0.791266	0.823925	0.564953	0.539833	0.842067	0.690385	0.665298	0.584787	0.542607	0.609641	0.566038	0.741454	0.732014	0.697736	0.770304	0.634058	0.575964	0.56321	0.518217	0.562162	0.821553	0.629399	0.677664	0.600333	0.677748	0.765603	0.626451	0.738008	0.687696	0.868055	0.703777	0.696566	0.639899	0.674877	0.682696	0.671959	0.759707	0.631417	0.659811	0.628929	0.650607	0.672674	0.600756
140	62	0.727048	0.753851	0.835324	0.857705	0.852328	0.733533	0.861703	0.567233	0.53961	0.82752	0.691306	0.757291	0.57429	0.557921	0.618027	0.5939	0.759661	0.726934	0.706664	0.76959	0.646179	0.568213	0.572808	0.537904	0.570432	0.787207	0.652404	0.698844	0.61479	0.678249	0.719979	0.640175	0.782822	0.714698	0.850765	0.715029	0.792156	0.686041	0.682739	0.715591	0.655586	0.752999	0.607464	0.688306	0.616243	0.668223	0.66846	0.610056
170	62	0.754026	0.849945	0.789244	0.88623	0.743575	0.744639	0.86849	0.569973	0.542954	0.870227	0.690275	0.891343	0.597773	0.546946	0.647026	0.634704	0.765924	0.758429	0.662125	0.794017	0.646268	0.582819	0.566508	0.542904	0.590338	0.878441	0.664064	0.693316	0.611878	0.742602	0.801116	0.671239	0.75011	0.738623	0.876649	0.753323	0.715795	0.671843	0.715203	0.706313	0.674097	0.78344	0.631691	0.67147	0.67092	0.722706	0.703691	0.63373
200	62	0.726693	0.767164	0.811876	0.892694	0.814324	0.726349	0.871083	0.579646	0.544796	0.803166	0.693623	0.885055	0.591112	0.548041	0.656531	0.614359	0.821458	0.745642	0.685493	0.815508	0.681148	0.573644	0.616949	0.556522	0.579145	0.896274	0.683169	0.691642	0.636425	0.700453	0.730667	0.666987	0.763715	0.709554	0.890407	0.757966	0.776598	0.694706	0.679382	0.732872	0.675724	0.736793	0.622608	0.698047	0.683513	0.706645	0.689549	0.63212
240	62	0.723999	0.89082	0.816328	0.864985	0.829733	0.769673	0.883959	0.602732	0.557813	0.820881	0.690827	0.746594	0.617511	0.553229	0.654663	0.624878	0.829862	0.756413	0.702969	0.776277	0.702657	0.607156	0.630836	0.576513	0.607054	0.838181	0.691431	0.718433	0.643258	0.680544	0.723724	0.695363	0.735226	0.737582	0.825868	0.765198	0.781315	0.73479	0.736451	0.763271	0.71086	0.784989	0.666202	0.701735	0.700134	0.665955	0.670699	0.636115
290	62	0.761281	0.842674	0.763626	0.926481	0.799185	0.747214	0.847225	0.61455	0.579129	0.847254	0.716954	0.959181	0.613045	0.562322	0.702177	0.630576	0.839573	0.790472	0.698919	0.78807	0.723184	0.62424	0.633376	0.601969	0.600898	0.868712	0.709964	0.732382	0.644839	0.723696	0.731096	0.711951	0.78112	0.729183	0.844246	0.787409	0.741001	0.749351	0.737105	0.757548	0.736134	0.79387	0.672669	0.722385	0.782957	0.744579	0.757771	0.658903
350	62	0.787688	0.807647	0.807792	0.887465	0.852536	0.784893	0.932377	0.624215	0.578947	0.851963	0.71899	0.81952	0.654176	0.553157	0.707152	0.627752	0.844325	0.755489	0.685868	0.797578	0.745103	0.638868	0.625731	0.602014	0.609498	0.840376	0.749772	0.755815	0.686309	0.735051	0.803403	0.704686	0.79262	0.759675	0.876861	0.799256	0.784076	0.774421	0.733963	0.763528	0.687819	0.817749	0.632453	0.750379	0.730337	0.755286	0.732829	0.668205
400	62	0.747129	0.848075	0.850998	0.839168	0.826113	0.774984	0.904689	0.645008	0.60439	0.853074	0.732447	0.895961	0.661892	0.586086	0.724957	0.623843	0.855517	0.750483	0.741052	0.860509	0.76954	0.634031	0.610318	0.608651	0.618973	0.876859	0.740632	0.779712	0.680608	0.729699	0.8224	0.739002	0.801861	0.735103	0.886848	0.804981	0.832576	0.773454	0.779188	0.746574	0.750833	0.808207	0.659644	0.759937	0.758076	0.737032	0.727404	0.6914
480	62	0.762966	0.751587	0.845332	0.875938	0.770174	0.768761	0.856202	0.628621	0.615697	0.894727	0.710829	0.790342	0.683327	0.574734	0.75556	0.655489	0.903376	0.82385	0.691363	0.807838	0.77639	0.668602	0.656537	0.63731	0.615932	0.879379	0.764804	0.770585	0.69651	0.737875	0.805678	0.762117	0.804595	0.745367	0.853109	0.825158	0.814083	0.765928	0.765172	0.806475	0.702347	0.838586	0.694367	0.756968	0.790393	0.709361	0.785648	0.702649
580	62	0.782883	0.817525	0.843001	0.940309	0.798571	0.79538	0.915436	0.646553	0.638112	0.832161	0.756296	0.94743	0.697785	0.595002	0.772764	0.630163	0.889932	0.77225	0.720596	0.813128	0.798464	0.679591	0.649845	0.650126	0.643514	0.901738	0.790765	0.793647	0.708297	0.772071	0.816308	0.75464	0.806597	0.796791	0.880818	0.840608	0.833204	0.819267	0.764414	0.787643	0.703828	0.850558	0.668992	0.760369	0.775836	0.787857	0.739116	0.717731
900	62	0.789467	0.876122	0.901682	0.928997	0.813738	0.786608	0.87426	0.692664	0.662872	0.860844	0.781857	0.907639	0.724743	0.632289	0.83032	0.636614	0.912918	0.795344	0.725484	0.867244	0.828913	0.734267	0.668823	0.711598	0.729122	0.923927	0.811423	0.828519	0.770354	0.793951	0.85615	0.788339	0.832482	0.748174	0.873595	0.869566	0.890493	0.803968	0.834373	0.881323	0.756028	0.871258	0.702914	0.798631	0.846894	0.784107	0.798166	0.75576
1200	62	0.779177	0.978064	0.869542	0.889426	0.937149	0.760849	0.875399	0.705441	0.673443	0.831875	0.788259	1.00002	0.763156	0.636001	0.871537	0.653541	0.901299	0.796442	0.692214	0.874668	0.846802	0.74333	0.7093	0.745633	0.735768	0.849364	0.819684	0.838409	0.812612	0.801813	0.904456	0.845688	0.839432	0.786189	1.03468	0.923288	0.890712	0.839424	0.83423	0.845065	0.804432	0.895422	0.728378	0.84233	0.901444	0.836581	0.833223	0.787349
1800	62	0.835541	0.895068	0.818107	0.878948	0.768529	0.84364	0.873738	0.734872	0.729954	0.858173	0.853181	1.00991	0.803335	0.67311	0.872098	0.668569	0.925271	0.810864	0.729462	0.846856	0.832171	0.788358	0.740162	0.781815	0.769702	0.931506	0.87983	0.855148	0.788172	0.836127	0.876183	0.866301	0.874607	0.861314	1.00752	0.910457	0.929455	0.83138	0.864155	0.911864	0.834579	0.945706	0.799567	0.847138	0.928835	0.880448	0.831339	0.814102
2800	62	0.823974	0.861346	0.926389	0.80904	0.865746	0.841704	0.938909	0.769783	0.766777	0.957384	0.872012	0.915631	0.810899	0.705203	0.914105	0.644553	0.855867	0.844088	0.752957	0.922739	0.91313	0.802077	0.757435	0.839453	0.8157	0.969905	0.88875	0.865662	0.85351	0.861221	0.898563	0.850564	0.890692	0.821294	1.04325	0.915719	0.869959	0.870589	0.882177	0.873128	0.838863	0.965202	0.826278	0.89491	0.854056	0.92445	0.824001	0.837158
4000	62	0.841264	0.940022	0.932041	0.859774	0.844575	0.875106	0.927515	0.811011	0.794527	0.934726	0.881643	1.02368	0.856195	0.724789	0.914725	0.667426	0.946226	0.908306	0.772896	0.891143	0.924572	0.825572	0.814594	0.862885	0.832147	0.996212	0.945943	0.909466	0.850874	0.88675	0.956813	0.878505	0.947486	0.879059	1.00159	0.893525	0.931118	0.883828	0.921661	0.93938	0.836733	0.963084	0.855071	0.894458	0.875844	0.888978	0.841037	0.865721
4970	62	0.808431	0.887865	0.915841	0.897159	0.849544	0.848594	0.907453	0.792183	0.815896	0.853966	0.839351	0.922583	0.859914	0.736033	0.909054	0.693533	0.9648	0.814582	0.705442	0.913367	0.942552	0.858276	0.829355	0.856408	0.831255	1.01454	0.958349	0.91227	0.920913	0.919256	0.93942	0.875216	0.921913	0.932106	1.07989	0.887879	0.911463	0.90169	0.835304	0.873201	0.866478	0.912498	0.908176	0.924982	0.910708	0.885361	0.887137	0.922695
6000	62	0.809879	0.857905	0.928233	0.838841	0.87842	0.889355	0.903715	0.80623	0.868929	0.848072	0.89727	0.966651	0.898377	0.764978	0.968586	0.707307	0.974122	0.867194	0.727364	0.889007	0.913123	0.834823	0.862615	0.887634	0.867118	0.995902	0.944578	0.946262	0.894686	0.937129	0.914539	0.848673	0.884928	0.931599	0.962713	0.866613	0.920913	0.858468	0.912561	0.959612	0.840849	0.942274	0.869726	0.959913	0.900719	0.857823	0.910241	0.912377
7000	62	0.893041	0.873617	0.905435	0.917279	0.997268	0.844265	0.956604	0.834666	0.892549	0.890054	0.885798	1.12152	0.918367	0.783808	0.91698	0.702117	0.974596	0.852721	0.761911	0.88928	0.976053	0.844634	0.849909	0.895445	0.841007	1.03627	0.935641	0.941697	0.879916	0.908781	0.907008	0.867608	0.895531	0.89292	0.911512	0.872182	1.0209	0.864984	0.89345	0.85576	0.853296	0.933214	0.906246	1.01602	0.875886	0.919886	0.850947	0.891605
8000	62	0.850242	0.83957	0.913618	0.940959	0.981266	0.884752	0.928411	0.828981	0.929468	0.944736	0.921418	1.23201	0.945396	0.759612	0.942912	0.736227	0.942221	0.925812	0.769173	0.911474	0.944299	0.851369	0.876746	0.8877	0.808167	1.02108	0.967354	0.928351	0.872735	0.872622	0.965898	0.879918	0.921504	0.895812	0.925294	0.854485	0.898616	0.862723	0.855708	0.890889	0.833093	0.919641	0.906746	0.975527	0.839331	0.960109	0.857514	0.924408
9000	62	0.848305	0.875894	0.949199	0.955767	0.973443	0.85253	0.915403	0.806061	0.891226	0.944298	0.865362	1.43657	0.888751	0.789899	0.944996	0.699805	0.930811	0.875959	0.71737	0.908	0.995607	0.869322	0.883278	0.909288	0.824979	0.956736	0.949292	0.922805	0.872897	0.860182	1.0254	0.892895	0.898729	0.923096	0.964624	0.855898	0.84464	0.874726	0.890704	0.880813	0.856441	0.888844	0.92082	1.00393	0.881387	0.965027	0.868185	0.945802
9970	62	0.856897	0.911007	0.924921	0.88865	0.994742	0.855853	0.926496	0.828642	0.884594	0.982573	0.880783	1.33021	0.917951	0.80718	0.944396	0.72427	0.987043	0.902773	0.79195	0.888826	0.979031	0.877625	0.870427	0.884383	0.805094	0.970384	0.936868	0.930503	0.899995	0.835619	1.05217	0.92295	0.876993	0.929112	0.993731	0.884907	0.879345	0.890323	0.927601	0.885008	0.87607	0.852994	0.913039	1.00058	0.915381	0.895177	0.820565	0.924158
N	619	11	4	15	5	5	12	14	15	15	8	24	3	22	24	12	13	5	10	6	11	17	23	11	18	12	4	11	12	12	16	4	12	6	6	5	24	5	10	10	9	5	5	5	10	5	4	5	10
Condition: 21C temperature
Pulse		MFT #
ms	COUNT	610	611	612	613	614	615	616	617	618	619	1600	1601	1602	1603	1604	1605	1606	1607	1608	1609	1610	1611	1612	1613	1614	1615	1616	1617	1618	1619	1620	1621	1622	1623	1624	1625
20	36	1.00466	1.02039	1.00736	1.00783	0.98848	1.00393	1.01824	1.00654	1.03998	1.0107	1.00593	0.99731	0.997117	1.00808	1.00333	1.0186	1.01618	1.02258	1.02001	1.01501	0.994069	0.995444	1.0121	0.975795	0.983817	1.00843	0.9923	1.00218	1.03331	1.02986	1.00462	1.00975	1.00604	0.999926	1.00581	1.013
50	36	1.00214	0.993921	0.990196	0.992216	1.00974	0.995364	0.990074	0.99294	0.977933	1.00169	1.00176	1.022	0.999124	1.00761	0.996487	0.997176	0.988331	0.979519	0.991147	0.995219	0.992561	1.01064	1.01628	1.00192	1.01187	0.989153	0.995299	1.01375	0.985476	0.975254	0.995012	0.982816	0.994829	0.99537	0.991086	1.00103
80	36	0.993203	0.985691	1.00245	0.999952	1.00178	1.00071	0.991684	1.00052	0.982084	0.987604	0.992312	0.980685	1.00376	0.984319	1.00018	0.984229	0.995487	0.997902	0.98884	0.989768	1.01337	0.993917	0.971613	1.02229	1.00431	1.00241	1.0124	0.984076	0.981214	0.994891	1.00036	1.00744	0.999129	1.0047	1.0031	0.985969
110	36	0.548404	0.498587	0.544966	0.570516	0.49177	0.543431	0.677687	0.597344	0.543817	0.576852	0.564682	0.548465	0.551314	0.595676	0.626106	0.566557	0.623631	0.578517	0.551939	0.627793	0.556485	0.652812	0.537456	0.809854	0.721263	0.623355	0.65039	0.548452	0.597775	0.616116	0.632766	0.655639	0.682017	0.55434	0.635905	0.535932
140	36	0.558205	0.513443	0.552868	0.609721	0.502873	0.534077	0.683186	0.601056	0.601392	0.597957	0.553609	0.608504	0.569637	0.607732	0.649764	0.575261	0.645793	0.576028	0.581552	0.6701	0.559092	0.691313	0.585374	0.766399	0.726891	0.63248	0.668448	0.5471	0.618758	0.603815	0.62899	0.657068	0.703611	0.552244	0.679991	0.530503
170	36	0.565834	0.514742	0.558484	0.626689	0.493122	0.547283	0.66702	0.623794	0.599608	0.574837	0.567364	0.657456	0.581821	0.570329	0.669058	0.607359	0.655362	0.595157	0.573514	0.662824	0.582737	0.650089	0.622472	0.825206	0.698833	0.673483	0.670285	0.563155	0.654721	0.620011	0.649148	0.662233	0.688946	0.563086	0.673591	0.542692
200	36	0.548194	0.521052	0.55402	0.625735	0.455878	0.61051	0.638852	0.599761	0.594181	0.580007	0.544534	0.662141	0.544074	0.573124	0.678136	0.59902	0.689556	0.594103	0.572178	0.638988	0.586717	0.689203	0.616944	0.758094	0.694451	0.682952	0.666157	0.543654	0.650228	0.588175	0.655201	0.670723	0.735442	0.562529	0.715216	0.535559
240	36	0.551558	0.520979	0.564261	0.652123	0.472529	0.549278	0.671773	0.594483	0.626553	0.603998	0.568878	0.689613	0.521555	0.596309	0.684812	0.613117	0.697119	0.591547	0.600209	0.641117	0.566885	0.662623	0.631161	0.782302	0.704781	0.685072	0.693228	0.558072	0.67082	0.626138	0.655195	0.656794	0.703009	0.548716	0.722616	0.509148
290	36	0.559953	0.505046	0.584309	0.671641	0.482227	0.551326	0.679245	0.596665	0.640185	0.598292	0.584852	0.704729	0.532293	0.578733	0.702847	0.613228	0.714293	0.634798	0.572193	0.646486	0.574917	0.714421	0.625882	0.779079	0.718125	0.685464	0.696304	0.541553	0.714418	0.63466	0.649611	0.661733	0.734231	0.555719	0.751512	0.522576
350	36	0.556757	0.509439	0.592322	0.677832	0.46375	0.55721	0.673457	0.612985	0.663333	0.591301	0.59144	0.766324	0.543776	0.605445	0.742418	0.636792	0.738673	0.652669	0.604526	0.640353	0.577703	0.714255	0.6625	0.810168	0.734822	0.70223	0.695822	0.552078	0.720373	0.651882	0.671096	0.670404	0.706757	0.555166	0.771289	0.50954
400	36	0.541728	0.516658	0.612512	0.695919	0.458516	0.541738	0.684584	0.614877	0.660211	0.596921	0.584456	0.77631	0.55617	0.613629	0.761399	0.646791	0.773567	0.634031	0.608403	0.677246	0.565144	0.690261	0.64406	0.715983	0.711449	0.722705	0.722573	0.558166	0.744794	0.653994	0.647826	0.667582	0.758035	0.538292	0.764675	0.506425
480	36	0.566771	0.548663	0.647252	0.732839	0.464134	0.557159	0.691071	0.63916	0.684552	0.605131	0.596124	0.749355	0.532482	0.609019	0.778055	0.662824	0.771067	0.665497	0.629895	0.667493	0.577207	0.713048	0.694693	0.804233	0.750888	0.745875	0.72745	0.568358	0.759073	0.696214	0.649572	0.663108	0.754526	0.557472	0.767032	0.485229
580	36	0.570567	0.539762	0.648861	0.740271	0.480425	0.534519	0.67017	0.641665	0.68492	0.616909	0.606334	0.770139	0.51868	0.635633	0.763345	0.682108	0.797257	0.681485	0.652519	0.660841	0.589993	0.738848	0.726601	0.770445	0.748512	0.74735	0.759529	0.588216	0.797772	0.722849	0.68555	0.721202	0.794357	0.574182	0.800514	0.51905
900	36	0.57989	0.566436	0.691977	0.796902	0.468035	0.575833	0.719443	0.673994	0.787449	0.674008	0.656964	0.800383	0.549856	0.670429	0.805279	0.726587	0.837469	0.707578	0.676822	0.712939	0.627521	0.766921	0.758554	0.756855	0.774372	0.787244	0.771244	0.601982	0.812278	0.762439	0.691258	0.725424	0.80985	0.571349	0.837019	0.510687
1200	36	0.60117	0.589908	0.739387	0.829541	0.485951	0.574347	0.739611	0.713737	0.760332	0.68697	0.667654	0.838892	0.514775	0.691714	0.822141	0.754393	0.851523	0.751406	0.734334	0.713786	0.659361	0.785152	0.786426	0.783769	0.797154	0.856459	0.808421	0.596889	0.837284	0.776686	0.736619	0.753202	0.806803	0.615505	0.82759	0.517353
1800	36	0.610829	0.59464	0.774476	0.850638	0.479805	0.644241	0.823609	0.73742	0.80243	0.702819	0.690466	0.853378	0.562613	0.719805	0.866883	0.780226	0.869873	0.808787	0.75019	0.742512	0.718376	0.827514	0.80244	0.844145	0.83025	0.874817	0.835846	0.631773	0.866912	0.799241	0.784478	0.768681	0.854336	0.635569	0.885458	0.545829
2800	36	0.666809	0.624207	0.775045	0.880786	0.491043	0.640665	0.820353	0.770283	0.839322	0.767948	0.715464	0.895371	0.565639	0.791676	0.893874	0.814526	0.901465	0.809817	0.796563	0.767332	0.757431	0.853582	0.827225	0.857075	0.854192	0.926698	0.892131	0.684012	0.904565	0.836802	0.816389	0.812265	0.824719	0.674212	0.888985	0.547329
4000	36	0.677241	0.680947	0.841486	0.899551	0.52401	0.670912	0.804168	0.81249	0.914746	0.768844	0.74265	0.858494	0.565453	0.832704	0.912364	0.869246	0.921784	0.854563	0.812112	0.82153	0.802058	0.862663	0.890682	0.877934	0.890691	0.886147	0.902927	0.709178	0.888549	0.902208	0.839896	0.854215	0.880652	0.707737	0.914097	0.545798
4970	36	0.695698	0.676692	0.854271	0.926217	0.545987	0.648289	0.820385	0.820842	0.865709	0.764355	0.754108	0.894489	0.553241	0.810913	0.940351	0.884763	0.93581	0.90913	0.843343	0.859908	0.804912	0.824243	0.869983	0.902663	0.873823	0.880867	0.889095	0.71508	0.905611	0.878275	0.845313	0.848477	0.919614	0.723947	0.927943	0.559536
6000	36	0.692957	0.709655	0.873533	0.923829	0.541112	0.675502	0.830358	0.80416	0.866164	0.807493	0.77032	0.876452	0.562223	0.797362	0.973454	0.898785	0.937959	0.887158	0.841401	0.83392	0.857885	0.873669	0.894092	0.966018	0.908764	0.925925	0.88163	0.736305	0.928303	0.88822	0.856389	0.870572	0.934761	0.749171	0.919549	0.576349
7000	36	0.712416	0.730029	0.865266	0.917584	0.551922	0.70765	0.838037	0.829009	0.945227	0.772852	0.788661	0.953387	0.569818	0.82636	0.946619	0.887233	0.944849	0.930863	0.836102	0.874305	0.855546	0.89085	0.921194	0.883505	0.888407	0.923521	0.900101	0.767977	0.922222	0.93114	0.867572	0.853749	0.913963	0.753626	0.916793	0.572167
8000	36	0.724906	0.747494	0.862523	0.925412	0.578772	0.70006	0.851471	0.845815	0.942357	0.789397	0.776828	0.93019	0.591516	0.849535	0.93685	0.883254	0.917728	0.896844	0.854684	0.871762	0.847514	0.88236	0.848611	0.917207	0.92426	0.945221	0.926227	0.772871	0.936589	0.9163	0.849745	0.859945	0.922913	0.769181	0.945078	0.556469
9000	36	0.731033	0.748586	0.897585	0.949593	0.592673	0.672873	0.868751	0.86433	0.926737	0.791177	0.808209	0.919925	0.588121	0.859273	0.918118	0.914966	0.921482	0.880572	0.859024	0.828928	0.831103	0.889122	0.912463	0.911695	0.957929	0.937245	0.933706	0.782575	0.976451	0.943577	0.875677	0.884165	0.968795	0.74301	0.937727	0.601662
9970	36	0.748015	0.75834	0.906273	0.938115	0.566753	0.697023	0.848958	0.843331	0.894243	0.80563	0.793742	0.893116	0.589603	0.881442	0.955921	0.934274	0.906094	0.900802	0.851092	0.900527	0.857189	0.910009	0.883226	0.875395	0.93498	0.974107	0.939082	0.779531	0.928786	0.909052	0.875355	0.890631	0.933062	0.779201	0.93118	0.582722
N	414	24	12	18	24	12	6	12	24	8	18	11	10	5	10	10	20	10	10	15	5	10	10	10	5	9	10	15	10	10	5	10	10	7	10	10	9
Condition: 10 uM Cytochalasin D + 10 uM Latrunculin B (CD+LB) 35C
Pulse		MFT #
ms	COUNT	1200	1201	1202	1203	1204	1205	1206	1207	1208	1209	1210	1211	1212	1213	1214	1215	1216	1217	1218	1219	1220	1221	1222	1300	1301	1302	1303	1304	1305	1306	1400	1401	1402	1403	1404	1405	1406	1407	1408	1409	1410	1412	1413	1414	1415	1416	1417	1418
20	60	1.01066	0.983686	0.977313	0.997417	1.0265	0.992863	1.00287	0.981956	0.990177	0.975209	1.0065	1.00113	0.939066	0.991348	1.00167	0.96516	0.970946	0.980943	1.00355	0.991024	1.03522	0.992586	1.02131	1.00235	0.970832	1.04883	1.01496	1.02026	0.998504	0.968305	0.995008	1.00036	1.01819	0.999994	1.02494	1.00164	0.97175	1.01518	1.00543	0.964327	1.0388	1.01395	1.0038	0.99757	0.991546	0.985145	1.00125	1.02014
50	60	1.00081	0.980783	0.992391	0.998419	0.983231	1.01776	1.01872	0.979646	1.0089	1.00553	0.980892	1.00038	1.05938	1.02266	0.977934	1.09023	1.03582	1.00395	0.986366	1.02414	0.997523	0.997371	0.989805	1.00933	0.98395	0.9564	0.961233	1.00054	1.02012	1.03284	1.01116	0.99875	0.991032	1.0049	0.97024	0.996867	1.02507	0.976428	0.986506	1.01804	1.01211	0.999176	0.99135	0.989044	1.01784	1.00753	0.995112	1.00538
80	60	0.988533	1.03553	1.0303	1.00416	0.990266	0.989373	0.978411	1.0384	1.00092	1.01926	1.0126	0.998498	1.00155	0.985992	1.02039	0.94461	0.993238	1.01511	1.01008	0.984839	0.967254	1.01004	0.988886	0.988319	1.04522	0.994772	1.0238	0.979193	0.981378	0.99885	0.993828	1.00089	0.990774	0.99511	1.00482	1.00149	1.00318	1.00839	1.00806	1.01764	0.949085	0.986872	1.00485	1.01339	0.990613	1.00732	1.00364	0.974479
110	60	0.609828	0.580618	0.6455	0.683305	0.622236	0.679667	0.646169	0.597377	0.704698	0.692649	0.607477	0.626218	0.74938	0.702469	0.719556	0.771602	0.681746	0.802642	0.666797	0.746465	0.651497	0.638687	0.865315	0.767205	0.775236	0.813705	0.776866	0.733908	0.750241	0.746837	0.610855	0.6824	0.73964	0.638672	0.72695	0.585393	0.592636	0.608935	0.588646	0.824855	0.645982	0.635081	0.687791	0.676819	0.640856	0.677112	0.68965	0.720327
140	60	0.601727	0.649154	0.710784	0.788242	0.669868	0.713016	0.577018	0.638212	0.729474	0.71775	0.711982	0.652606	0.792265	0.650183	0.693366	0.886456	0.761086	0.875731	0.67998	0.802488	0.645698	0.657025	0.753252	0.815716	0.773175	0.850926	0.763533	0.749628	0.740951	0.793094	0.603824	0.685672	0.73969	0.696223	0.723061	0.623824	0.677271	0.697127	0.601839	0.754653	0.645426	0.709578	0.712735	0.718148	0.662216	0.714988	0.719603	0.763611
170	60	0.626337	0.62456	0.780036	0.749045	0.685731	0.744452	0.60261	0.628375	0.783743	0.736713	0.722466	0.695851	0.789913	0.732462	0.733781	0.828447	0.759692	0.838163	0.693374	0.797937	0.643664	0.654916	0.774781	0.824018	0.792176	0.805198	0.795328	0.765907	0.775164	0.842286	0.626968	0.68215	0.75184	0.730641	0.740958	0.635745	0.721794	0.758496	0.624236	0.831492	0.650989	0.727408	0.742979	0.746255	0.678308	0.73713	0.739525	0.735535
200	60	0.634595	0.658206	0.729877	0.743982	0.690923	0.781775	0.650942	0.637895	0.767131	0.749402	0.768215	0.686252	0.790253	0.760657	0.73475	0.914945	0.833297	0.824236	0.691617	0.725178	0.679177	0.67238	0.823445	0.862766	0.882031	0.876182	0.747824	0.761573	0.713641	0.817675	0.644165	0.679346	0.781717	0.760247	0.765206	0.652868	0.758016	0.72468	0.648305	0.787658	0.685548	0.743945	0.73111	0.762297	0.721195	0.774859	0.723033	0.780322
240	60	0.620212	0.684938	0.698456	0.768879	0.700003	0.799669	0.650884	0.688919	0.77627	0.777781	0.790355	0.713826	0.820773	0.771627	0.746687	0.932403	0.752075	0.86164	0.715326	0.767964	0.694985	0.697	0.843961	0.871191	0.90214	0.880337	0.79028	0.754361	0.765537	0.812787	0.651287	0.69007	0.785767	0.799879	0.784978	0.698722	0.716246	0.777406	0.65841	0.837693	0.663066	0.745922	0.751198	0.767612	0.693685	0.78452	0.778754	0.749651
290	60	0.648082	0.730735	0.848754	0.804286	0.727809	0.84237	0.625653	0.694423	0.766217	0.768819	0.813001	0.760243	0.801126	0.764587	0.753189	0.874726	0.795031	0.854001	0.739809	0.783422	0.695865	0.683319	0.842473	0.906939	0.857068	0.827958	0.814139	0.791879	0.778418	0.905745	0.64898	0.718382	0.776503	0.813014	0.780001	0.67112	0.759219	0.775131	0.682897	0.803766	0.705779	0.794908	0.789832	0.80348	0.737689	0.803743	0.796909	0.727678
350	60	0.638559	0.739092	0.852673	0.791421	0.749939	0.806785	0.642866	0.711354	0.803335	0.753161	0.839559	0.778984	0.840527	0.809736	0.779631	0.923683	0.779187	0.814118	0.732328	0.846059	0.784191	0.687563	0.86586	0.912588	0.857495	0.891677	0.82337	0.780369	0.858131	0.812921	0.672855	0.740644	0.817072	0.849729	0.788462	0.699775	0.781719	0.869975	0.696315	0.787803	0.665612	0.884309	0.79337	0.863698	0.745916	0.821605	0.794746	0.773863
400	60	0.682626	0.756379	0.840316	0.804129	0.763992	0.848081	0.637044	0.71311	0.801858	0.824225	0.861769	0.772004	0.833944	0.809422	0.794069	0.866907	0.804633	0.86758	0.741541	0.76349	0.753368	0.701045	0.84045	0.913644	0.855229	0.875072	0.762528	0.82289	0.853421	0.796182	0.703228	0.742852	0.817689	0.839937	0.830969	0.712152	0.771193	0.785466	0.689199	0.837859	0.674784	0.806847	0.82052	0.846678	0.752863	0.860849	0.832994	0.801744
480	60	0.670112	0.771761	0.847616	0.850987	0.774709	0.857214	0.660274	0.724734	0.841698	0.82499	0.863948	0.789445	0.859005	0.819251	0.789927	0.90756	0.851097	0.821985	0.760205	0.78596	0.748905	0.705945	0.879994	0.925211	0.805053	0.903804	0.862996	0.831685	0.823418	0.912373	0.704169	0.741659	0.876148	0.861229	0.852565	0.741304	0.832825	0.839595	0.735434	0.892862	0.696089	0.866813	0.868041	0.858011	0.784207	0.822186	0.836736	0.801286
580	60	0.670177	0.722088	0.829139	0.810739	0.81198	0.804514	0.657212	0.750639	0.810647	0.841137	0.886359	0.8213	0.874349	0.834943	0.795945	0.86192	0.804184	0.842702	0.773457	0.755256	0.85088	0.729643	0.82431	0.943225	0.801098	0.925636	0.781871	0.820626	0.860733	0.865149	0.723908	0.794468	0.870266	0.859539	0.817571	0.749147	0.847649	0.79814	0.740381	0.8611	0.679994	0.858374	0.870736	0.87586	0.803877	0.85828	0.877225	0.786259
900	60	0.724067	0.808952	0.834804	0.864363	0.85299	0.865898	0.676567	0.781684	0.82009	0.851117	0.885595	0.840872	0.853969	0.856934	0.845815	0.789856	0.87305	0.893234	0.811119	0.86871	0.832375	0.724698	0.891142	0.975196	0.893025	0.937112	0.857391	0.848699	0.929087	0.906879	0.76591	0.821884	0.918534	0.92637	0.879356	0.797861	0.891428	0.895541	0.800366	0.932359	0.718532	0.917083	0.862951	0.880689	0.821349	0.847815	0.897982	0.872379
1200	60	0.774859	0.818736	0.812887	0.900756	0.873846	0.903646	0.708965	0.763591	0.869976	0.888948	0.900916	0.904121	0.836016	0.887638	0.863728	0.882146	0.863646	0.892487	0.805995	0.855638	0.821981	0.800921	0.911043	0.965404	0.891102	0.966815	0.87064	0.855045	0.897146	0.866898	0.789059	0.794243	0.937641	0.915424	0.880761	0.814757	0.898711	0.894826	0.827785	0.84886	0.708268	0.89534	0.878061	0.918216	0.830794	0.906778	0.894063	0.861949
1800	60	0.797112	0.877981	0.927873	0.897644	0.88721	0.912615	0.72711	0.795002	0.913526	0.886871	0.988942	0.863164	0.944684	0.954321	0.898283	0.914385	0.880898	0.916258	0.838741	0.879247	0.888609	0.824571	0.93964	0.9877	0.791667	0.923538	0.82867	0.885566	0.927555	1.00566	0.815439	0.822049	0.933241	0.92871	0.906475	0.84535	0.955129	0.888013	0.865389	1.01759	0.749023	0.910758	0.902078	0.902424	0.871436	0.926676	0.914574	0.91394
2800	60	0.825583	0.846657	0.887902	0.927124	0.924687	0.919016	0.680086	0.778768	0.884826	0.897985	0.981913	0.897324	0.945127	0.939349	0.919061	0.763898	0.891221	0.873188	0.855868	0.87954	0.962899	0.824873	0.895063	0.997828	0.887859	0.944158	0.803097	0.86938	0.992482	0.934227	0.823179	0.805792	0.953342	0.948363	0.914064	0.838415	0.912609	0.938743	0.896058	0.873724	0.762349	0.919801	0.927958	0.96222	0.886798	0.922622	0.929558	0.941747
4000	60	0.8364	0.855278	0.855747	0.936226	0.923495	0.933733	0.734067	0.823651	0.860162	0.894782	0.961616	0.879705	0.995322	0.949318	0.909293	0.878509	0.856434	0.925364	0.846537	0.886165	0.962439	0.866058	0.923172	0.990629	0.972497	0.971211	0.896754	0.911077	0.890733	0.967008	0.840966	0.854426	1.01333	0.938489	0.924166	0.856257	0.961129	1.01209	0.909482	0.925716	0.782723	0.958798	0.918197	0.950229	0.872019	0.917245	0.950225	0.97311
4970	60	0.874416	0.855646	0.899756	0.927015	0.918667	0.906011	0.7298	0.837754	0.84708	0.970248	0.944727	0.909501	0.897784	0.941283	0.910794	0.814301	0.825752	0.955019	0.858658	0.903922	1.0388	0.836676	0.93893	0.974965	0.937946	0.957274	0.969115	0.907919	0.886468	0.978072	0.890129	0.821622	0.976465	0.931918	0.927869	0.878567	0.979463	0.932593	0.905299	0.919051	0.749864	0.901519	0.95804	0.945759	0.884451	0.943778	0.946526	0.966667
6000	60	0.894824	0.814311	0.890771	0.959991	0.958515	0.858949	0.743095	0.83198	0.929258	0.924458	0.956476	0.925294	1.0334	0.965934	0.934904	0.827042	0.881192	0.932718	0.851369	0.900096	1.0612	0.852906	0.933141	1.00114	0.898126	0.936691	0.993557	0.921407	0.919886	0.933281	0.875043	0.886001	1.03464	0.904501	0.950039	0.84728	0.982966	1.02835	0.915689	0.960947	0.77282	0.927565	0.939827	0.932274	0.872302	0.920374	0.947352	0.997236
7000	60	0.901788	0.99874	0.904174	0.930495	0.933975	0.880241	0.753395	0.845861	0.893969	0.944326	0.971897	0.90793	0.935748	1.0134	0.92611	0.948146	0.849208	0.972785	0.881312	0.944386	1.06698	0.84504	0.993613	0.959759	0.909519	1.00422	1.02124	0.893016	0.919204	0.959769	0.89268	0.875395	1.02907	0.903582	0.94989	0.873737	1.01852	0.978685	0.924943	0.987688	0.775866	0.950225	0.974264	0.931689	0.860974	0.947911	0.95692	1.00029
8000	60	0.886566	1.07517	0.903648	0.97883	0.951894	0.908645	0.680673	0.911773	0.933163	0.940097	0.961231	0.906058	1.01623	0.987186	0.948859	0.91752	0.870456	1.03909	0.891706	0.871332	1.06326	0.856516	0.924971	1.02532	0.917095	0.960471	0.95637	0.904047	0.957117	1.01598	0.867876	0.843206	0.99507	0.909866	0.939964	0.840063	0.96287	0.998387	0.923027	0.933535	0.777464	0.963947	0.914877	0.967584	0.847478	0.950487	0.938583	1.00989
9000	60	0.91444	1.07823	0.924011	0.932934	0.968153	0.893463	0.813136	0.848993	0.895654	0.935951	0.966989	0.903622	1.0185	0.996991	0.930693	0.747632	0.816036	1.0578	0.913502	0.976073	1.10425	0.867139	0.913489	1.00705	0.833258	0.914319	0.954061	0.926678	0.966015	1.11204	0.876767	0.840329	0.927933	0.915175	0.945393	0.874042	0.961604	0.948767	0.945007	0.899821	0.763875	0.926731	0.935654	0.949133	0.864032	0.980453	0.960718	0.963188
9970	60	0.923666	1.13679	0.931892	0.905879	0.988237	0.90034	0.730414	0.89263	0.932489	0.929512	0.936895	0.89905	1.04266	0.979167	0.949102	0.797118	0.837046	0.95801	0.882449	0.912628	1.15119	0.879864	0.983786	1.0103	0.947026	0.969541	0.967735	0.931585	1.00002	0.957147	0.87999	0.912477	0.930672	0.928535	0.983444	0.86603	0.97425	0.939947	0.92351	1.03881	0.800834	0.937429	0.953696	0.962881	0.884256	0.944913	0.949637	0.925159
N	458	15	4	5	4	16	10	4	4	8	10	8	16	3	7	12	4	4	8	12	4	4	8	4	12	4	5	5	10	5	5	15	12	8	20	8	12	7	4	24	4	4	4	8	6	10	4	12	4
Condition: 2 uM Jasplakinolide (Jaspla) 35C
Pulse		MFT #
ms	COUNT	1901	1902	1903	1904	1905	1906	1907	1908	1909	1910	1911	1912	1914	1915	1916	1917	1918	1919	1920	1921
20	20	1.00322	0.999592	0.991304	1.00444	1.01009	1.02283	1.01883	0.990574	1.0098	1.01625	0.957293	0.994056	1.02535	0.994281	1.00407	1.01765	1.02275	1.00564	0.995825	1.00473
50	20	0.985755	0.985653	1.0108	1.00373	0.999242	1.00454	0.995743	1.00065	0.998196	1.00105	1.03826	1.00457	0.997642	1.00136	0.980654	0.984541	0.998072	0.994712	0.998768	0.990427
80	20	1.01102	1.01475	0.997891	0.99183	0.990667	0.972629	0.985428	1.00877	0.992007	0.982702	1.00445	1.00137	0.977006	1.00436	1.01528	0.997808	0.979178	0.999646	1.00541	1.00484
110	20	0.700384	0.578767	0.590541	0.594303	0.611265	0.618927	0.610484	0.641602	0.684229	0.626306	0.705442	0.645262	0.785648	0.634089	0.686914	0.667688	0.704096	0.594041	0.61667	0.639994
140	20	0.733476	0.554998	0.584861	0.617807	0.635542	0.584128	0.650059	0.64808	0.718398	0.636509	0.699038	0.641999	0.795565	0.669391	0.697581	0.675363	0.774223	0.610613	0.666938	0.665257
170	20	0.725324	0.560376	0.604927	0.6264	0.622922	0.630828	0.610411	0.656425	0.715121	0.628064	0.678172	0.664281	0.812578	0.65005	0.696723	0.653051	0.769526	0.630388	0.661733	0.652132
200	20	0.726562	0.587345	0.628531	0.632243	0.643491	0.612218	0.649662	0.642547	0.729611	0.666249	0.690491	0.653144	0.845366	0.670396	0.717627	0.683907	0.725328	0.628914	0.670703	0.652089
240	20	0.760475	0.590056	0.612623	0.643716	0.648855	0.59319	0.658756	0.655114	0.707025	0.648493	0.665962	0.670036	0.887142	0.671937	0.704243	0.67491	0.711674	0.648617	0.657472	0.638743
290	20	0.764635	0.582445	0.62922	0.643746	0.696269	0.629178	0.658996	0.674278	0.731741	0.67615	0.698665	0.667959	0.85518	0.68939	0.73735	0.683997	0.734345	0.660858	0.699001	0.623175
350	20	0.808534	0.593023	0.656055	0.663587	0.697755	0.625896	0.672132	0.698198	0.768005	0.66459	0.730368	0.676066	0.860218	0.716004	0.76387	0.689901	0.786386	0.669862	0.694295	0.677173
400	20	0.813962	0.641324	0.637792	0.68137	0.713364	0.623011	0.689649	0.702112	0.75781	0.694355	0.637741	0.674406	0.893208	0.715951	0.743616	0.70276	0.86607	0.69374	0.694448	0.643362
480	20	0.801955	0.660911	0.64889	0.690106	0.720668	0.610129	0.711554	0.720782	0.776392	0.678839	0.709414	0.705972	0.885964	0.746707	0.762642	0.710959	0.850572	0.711217	0.711758	0.687888
580	20	0.797761	0.665111	0.693202	0.712587	0.743076	0.631251	0.717153	0.728428	0.76888	0.718473	0.709583	0.676134	0.913949	0.775726	0.790574	0.699492	0.86189	0.734738	0.719021	0.688493
900	20	0.829374	0.730544	0.722869	0.749076	0.785482	0.635975	0.730025	0.777316	0.819965	0.743727	0.631756	0.72315	0.82999	0.761359	0.792695	0.748308	0.861563	0.76562	0.744543	0.71234
1200	20	0.857476	0.727558	0.767569	0.756925	0.80644	0.698963	0.770397	0.792888	0.851554	0.751716	0.67377	0.742112	0.867576	0.849744	0.845949	0.767782	0.86653	0.816692	0.789852	0.760619
1800	20	0.8476	0.768887	0.788599	0.816512	0.824385	0.734148	0.822192	0.817852	0.85272	0.778968	0.671945	0.766228	0.884269	0.858384	0.880803	0.786129	0.897966	0.82923	0.848383	0.763958
2800	20	0.881364	0.801162	0.839123	0.845996	0.8471	0.736337	0.868451	0.822215	0.904866	0.813243	0.68009	0.825652	0.887512	0.866455	0.888143	0.798417	0.919	0.862725	0.872184	0.826409
4000	20	0.871753	0.803542	0.845896	0.884209	0.870334	0.765869	0.881139	0.841445	0.900416	0.833909	0.710462	0.831833	0.919489	0.920918	0.896872	0.813845	0.95872	0.898076	0.893263	0.801957
4970	20	0.8536	0.837959	0.842219	0.867884	0.864891	0.758896	0.898924	0.857786	0.90685	0.803818	0.655968	0.846119	0.935989	0.923768	0.89895	0.826421	0.980478	0.922092	0.909705	0.828632
6000	20	0.892053	0.874762	0.848727	0.89531	0.868639	0.753216	0.914012	0.868055	0.903947	0.81788	0.618047	0.859081	0.912917	0.910009	0.915914	0.829822	1.00416	0.913262	0.891036	0.835724
7000	20	0.879318	0.901032	0.881262	0.903792	0.870151	0.791512	0.938816	0.88143	0.920928	0.835265	0.626429	0.834996	0.959939	0.925141	0.927434	0.836297	1.04991	0.910363	0.938823	0.922436
8000	20	0.857997	0.883835	0.877276	0.880388	0.892165	0.77422	0.928248	0.902009	0.850929	0.830284	0.718728	0.853686	0.910076	0.93411	0.979206	0.834116	1.02566	0.924534	0.900313	0.87262
9000	20	0.892815	0.942717	0.891939	0.878808	0.895432	0.80405	0.934746	0.892833	0.808562	0.831626	0.721492	0.859496	0.950925	0.93021	0.970037	0.84147	0.940188	0.933329	0.918986	0.83804
9970	20	0.872404	0.941234	0.879519	0.875592	0.909993	0.806785	0.965089	0.896481	0.823982	0.83098	0.743854	0.83205	0.953453	0.9723	0.946505	0.832029	0.94667	0.912595	0.910271	0.890119
N	307	14	12	24	24	24	13	16	24	7	23	5	23	8	14	16	16	5	24	8	7
Condition: 5 uM Jasplakinolide (Jaspla) 35C
Pulse		MFT #
ms	COUNT	2000	2001	2002	2003	2004	2005	2006	2007	2008	2009	2010	2011	2012	2013	2014	2015	2016	2017	2018	2019	2020	2021	2100	2101	2102	2103	2104	2105	2106	2107	2108	2109	2110	2111	2112	2113	2114	2115	2116	2117	2118	2119	2120	2121
20	44	1.01232	1.00137	0.983699	0.993965	1.03043	0.992601	0.980281	0.945519	0.989344	1.0343	0.998125	1.01005	1.01181	1.01391	0.988989	0.989807	1.01695	1.00956	0.941285	0.999769	1.02731	1.0131	1.00136	1.01533	0.982323	1.01886	0.992734	0.994646	0.995128	0.993319	0.974788	0.978622	1.01891	0.991254	0.99307	1.0103	1.04029	1.0259	1.0078	0.989248	0.983439	1.00688	1.00563	0.993642
50	44	1.00047	0.992728	1.0062	1.00217	0.995131	0.999382	0.996326	0.994663	1.01562	0.992492	0.996137	0.985724	0.997703	1.0044	1.01975	0.965415	1.01678	0.986119	0.98065	1.01769	0.94302	1.01624	1.00931	0.9944	1.00228	0.985851	1.01801	1.01011	1.01065	1.00053	0.998848	1.00002	0.999707	0.987745	1.01234	1.01065	0.994688	1.01177	0.995277	0.987341	1.0112	1.01573	0.990344	1.03928
80	44	0.987209	1.0059	1.0101	1.00387	0.974441	1.00802	1.02339	1.05982	0.995035	0.973213	1.00574	1.00423	0.990483	0.981694	0.991258	1.04478	0.966263	1.00432	1.07807	0.98254	1.02967	0.970667	0.98933	0.990272	1.0154	0.995293	0.989254	0.995245	0.994226	1.00615	1.02636	1.02136	0.981383	1.021	0.994586	0.979051	0.965018	0.962338	0.996923	1.02341	1.00536	0.977386	1.00403	0.967081
110	44	0.612739	0.508634	0.765758	0.610349	0.733187	0.617783	0.637161	0.728674	0.672921	0.675708	0.677014	0.598036	0.602702	0.612562	0.588025	0.839732	0.542089	0.581696	0.856725	0.576334	0.789231	0.61231	0.763722	0.655577	0.553012	0.559571	0.626016	0.59495	0.660511	0.638796	0.714893	0.786369	0.586031	0.757193	0.613169	0.64708	0.565629	0.854322	0.686863	0.620833	0.585296	0.616821	0.601248	0.732756
140	44	0.610924	0.548435	0.721235	0.608984	0.749515	0.634489	0.665218	0.701415	0.682982	0.670073	0.653116	0.623074	0.596648	0.652494	0.638201	0.768054	0.557422	0.606016	0.973897	0.585749	0.84282	0.6922	0.739136	0.665747	0.565127	0.571935	0.640831	0.60355	0.669917	0.687075	0.744038	0.759996	0.621561	0.758614	0.625958	0.648431	0.555994	0.883506	0.702013	0.618104	0.591899	0.624872	0.59394	0.743125
170	44	0.620073	0.55191	0.782711	0.614026	0.746312	0.649935	0.677173	0.748657	0.700774	0.715135	0.693295	0.650087	0.615358	0.672478	0.615356	0.761862	0.531878	0.623098	0.839511	0.615661	0.798908	0.611066	0.789123	0.656055	0.572985	0.554157	0.622421	0.576717	0.682114	0.638256	0.828932	0.761641	0.626882	0.776279	0.629247	0.688325	0.561752	0.864283	0.658877	0.631932	0.589734	0.612731	0.603181	0.710811
200	44	0.604268	0.573327	0.81446	0.607708	0.764928	0.639728	0.678283	0.772039	0.694225	0.715831	0.698513	0.656311	0.61487	0.67198	0.625748	0.762811	0.531417	0.642488	0.823746	0.609362	0.712351	0.675503	0.778285	0.658194	0.587666	0.594906	0.637194	0.610395	0.682137	0.671867	0.846474	0.749295	0.623802	0.745714	0.630641	0.692156	0.576999	0.854166	0.685018	0.667775	0.599696	0.616079	0.611341	0.716421
240	44	0.627345	0.541388	0.843802	0.622463	0.771512	0.669815	0.691475	0.831257	0.723785	0.728411	0.647965	0.657955	0.631374	0.675504	0.638337	0.788615	0.526158	0.617417	0.94926	0.60918	0.872457	0.595442	0.774468	0.673954	0.578367	0.598938	0.642929	0.602068	0.70164	0.674224	0.884105	0.729154	0.638501	0.79395	0.637277	0.697926	0.602976	0.916787	0.663511	0.642924	0.595956	0.620181	0.606559	0.725766
290	44	0.650069	0.59054	0.782766	0.621009	0.736021	0.682813	0.727713	0.817239	0.710806	0.678137	0.683308	0.667016	0.62783	0.6959	0.643712	0.757964	0.537512	0.656885	0.927629	0.603904	0.773685	0.627253	0.786221	0.676703	0.607683	0.605226	0.668697	0.596534	0.726231	0.677136	0.875288	0.767127	0.633797	0.788388	0.667637	0.703921	0.610055	0.855006	0.675016	0.664531	0.602249	0.616922	0.610275	0.714138
350	44	0.659862	0.581494	0.714089	0.62607	0.774275	0.698202	0.710114	0.827466	0.765623	0.717373	0.697645	0.696019	0.651406	0.713866	0.653763	0.776554	0.561435	0.636616	0.901567	0.641399	0.742585	0.595629	0.765242	0.670892	0.606947	0.622258	0.691845	0.635535	0.737426	0.685566	0.818119	0.789614	0.640196	0.796907	0.674719	0.727674	0.634478	0.875535	0.694552	0.66466	0.623277	0.62667	0.635041	0.725668
400	44	0.663722	0.565624	0.763233	0.629943	0.77746	0.719041	0.699629	0.800958	0.733005	0.726117	0.660058	0.703228	0.659275	0.730203	0.666616	0.730824	0.520781	0.665799	0.957515	0.632038	0.785335	0.648459	0.790944	0.681305	0.632417	0.629076	0.69887	0.623503	0.73432	0.700365	0.700389	0.816733	0.668652	0.771955	0.682512	0.717029	0.635965	0.884054	0.676698	0.692714	0.627149	0.649374	0.636263	0.704817
480	44	0.698641	0.593034	0.725982	0.649481	0.803321	0.721472	0.759143	0.865551	0.754009	0.750208	0.687659	0.713223	0.663631	0.714742	0.668847	0.732764	0.554185	0.679916	0.947647	0.644909	0.766406	0.639259	0.801432	0.680047	0.647937	0.636676	0.687159	0.677369	0.765062	0.740915	0.778524	0.813867	0.667916	0.791454	0.712735	0.737284	0.606916	0.89167	0.697423	0.698542	0.6438	0.651062	0.647634	0.730768
580	44	0.704965	0.630699	0.794146	0.66236	0.773881	0.753741	0.747548	0.841282	0.802067	0.762736	0.640919	0.734136	0.702392	0.745505	0.692524	0.810884	0.558102	0.691337	0.904283	0.692886	0.762255	0.614198	0.80256	0.702356	0.654131	0.701761	0.6953	0.648038	0.79814	0.721559	0.73857	0.838056	0.697976	0.804004	0.716891	0.761875	0.661832	0.865012	0.694745	0.700095	0.648433	0.664493	0.658215	0.763799
900	44	0.748048	0.618339	0.776444	0.68589	0.796804	0.772161	0.800773	0.83962	0.802068	0.805231	0.69948	0.768452	0.735463	0.745445	0.732536	0.816213	0.575607	0.709109	0.946511	0.732807	0.765534	0.701283	0.832061	0.72199	0.720483	0.71011	0.758066	0.68458	0.829816	0.778992	0.786012	0.838966	0.724841	0.876586	0.753261	0.777462	0.693687	0.893079	0.740285	0.760578	0.699222	0.694531	0.701769	0.782089
1200	44	0.769393	0.627038	0.893561	0.72537	0.810362	0.80227	0.823855	0.86639	0.841531	0.827587	0.708471	0.792796	0.767616	0.837906	0.742744	0.780584	0.622545	0.790406	0.92433	0.77512	0.852224	0.706244	0.830596	0.747234	0.724498	0.768321	0.770592	0.726774	0.846834	0.786025	0.824197	0.877032	0.741859	0.910461	0.806249	0.814347	0.708404	0.888325	0.760139	0.771636	0.711648	0.727863	0.709221	0.801883
1800	44	0.787491	0.675508	0.916175	0.753712	0.840558	0.835639	0.833838	0.893588	0.808669	0.850769	0.667658	0.820515	0.819939	0.859413	0.786898	0.808503	0.661513	0.802384	0.884412	0.799851	0.844807	0.677393	0.824082	0.768419	0.791581	0.781732	0.78812	0.768063	0.882714	0.833144	0.792747	0.861128	0.781462	0.901206	0.814849	0.837853	0.758359	0.91637	0.794426	0.829648	0.752029	0.763586	0.753606	0.853086
2800	44	0.848419	0.703799	0.921531	0.786183	0.849243	0.862518	0.860564	0.897198	0.888007	0.895888	0.706512	0.859525	0.848016	0.896727	0.805378	0.888208	0.697721	0.834415	0.928313	0.81008	0.875093	0.72616	0.876524	0.782567	0.831348	0.836129	0.82084	0.816913	0.884069	0.858576	0.811286	0.967512	0.815307	0.910083	0.857248	0.826921	0.798382	0.897071	0.836722	0.814345	0.797787	0.79029	0.800312	0.831776
4000	44	0.868248	0.710962	0.914888	0.824823	0.871359	0.8803	0.900904	0.902194	0.910452	0.864497	0.688807	0.887855	0.886476	0.9393	0.828303	0.945204	0.742945	0.911482	0.985329	0.842506	0.889017	0.775645	0.88551	0.800253	0.860133	0.859745	0.85397	0.902634	0.914802	0.873082	0.865379	0.948146	0.834581	0.956479	0.895934	0.879814	0.797379	0.919338	0.863491	0.847761	0.828524	0.842282	0.823449	0.897866
4970	44	0.869305	0.717535	0.845552	0.835432	0.890557	0.895149	0.90166	0.896565	0.90209	0.945405	0.690067	0.895394	0.86898	0.917046	0.852072	0.947187	0.7405	0.896778	0.964403	0.858452	0.906342	0.782418	0.895787	0.834609	0.887142	0.861408	0.841774	0.856134	0.899318	0.876217	0.906617	1.00367	0.825271	0.944102	0.884805	0.866531	0.829914	0.922649	0.88202	0.876473	0.861657	0.855872	0.824487	0.898738
6000	44	0.866967	0.763437	0.93266	0.857105	0.889854	0.897585	0.916326	0.948838	0.875444	0.855567	0.743154	0.902442	0.911733	0.927382	0.865405	0.936752	0.751975	0.926426	0.925566	0.879376	0.854099	0.863462	0.914524	0.815589	0.874754	0.882412	0.870511	0.876335	0.930652	0.867655	0.854249	0.974859	0.863334	0.964327	0.869096	0.901091	0.861315	0.958356	0.918309	0.912558	0.852856	0.885706	0.839169	0.943483
7000	44	0.873049	0.756885	0.98539	0.880503	0.930628	0.908035	0.881329	0.950276	0.871972	0.916724	0.741574	0.912649	0.916395	0.931884	0.863475	0.87698	0.766042	0.907928	0.92311	0.901149	0.914885	0.848196	0.935531	0.823704	0.914239	0.894677	0.843614	0.887994	0.91952	0.850576	1.00821	0.981398	0.855908	0.930256	0.862288	0.918744	0.896141	0.954063	0.890745	0.9152	0.862953	0.89439	0.847863	0.930982
8000	44	0.900691	0.791111	0.905773	0.880436	0.945814	0.921768	0.888371	0.888432	0.893675	0.924588	0.726414	0.904256	0.928208	0.919154	0.860156	0.872981	0.7707	0.865958	1.0155	0.893825	0.941282	0.82473	0.944076	0.827067	0.899287	0.878619	0.881371	0.937473	0.914573	0.914347	0.892986	1.03508	0.856194	0.94833	0.895636	0.966248	0.881348	0.96291	0.902217	0.924509	0.847673	0.910281	0.86197	0.941694
9000	44	0.902137	0.780678	0.905904	0.887508	0.943598	0.932171	0.910508	0.904349	0.934995	0.892231	0.747714	0.891265	0.954543	0.956376	0.84909	0.930972	0.800744	0.878842	0.979914	0.896502	0.947452	0.815122	0.916766	0.832076	0.904956	0.907266	0.894165	0.952361	0.947297	0.919652	0.95431	1.05064	0.861725	0.994072	0.876525	0.942254	0.877687	0.935572	0.930158	0.925767	0.895367	0.923228	0.881747	0.971784
9970	44	0.935957	0.770365	0.961039	0.901369	0.895486	0.942972	0.943755	0.947859	0.906123	0.938403	0.711882	0.902903	0.952782	0.94405	0.873233	0.953935	0.784592	0.914121	0.962695	0.90885	1.00628	0.847083	0.958817	0.843035	0.93192	0.875731	0.882203	0.935199	0.936384	1.04084	0.948717	1.03269	0.862815	0.99525	0.925106	0.960639	0.916289	0.942799	0.907529	0.943178	0.877652	0.919477	0.878678	0.951014
N	492	24	12	5	24	11	24	12	6	6	5	6	24	21	10	12	3	6	6	3	9	3	4	20	24	16	12	14	10	24	5	3	4	15	14	7	10	5	5	9	10	10	17	18	4
Condition: 2 uM Okadaic Acid (OA) 35C
Pulse		MFT #
ms	COUNT	1500	1503	1504	1505	1506	1507	1508	1509	1510	1511	1512	1513	1514	1515	1516	1517	1518	1519	1520	1801	1802	1803	1804	1805	1806	1807	1808	1809	1810	1813	1816	1817	1818	1819	1820	1821	1822	1823	1824	1825	1826	1827
20	42	0.994221	0.983906	0.996049	1.01309	1.00422	0.982139	1.00105	0.978808	0.997821	0.987695	0.9775	1.00063	1.00831	0.995772	0.992477	1.00159	1.00305	1.0011	1.00369	1.01897	1.01258	1.00704	0.975757	0.969165	0.992709	0.957585	0.990111	1.03027	0.999677	0.994081	0.985617	1.00427	1.01279	1.02187	1.03766	0.970676	0.988818	1.01796	1.00348	0.961367	0.953242	1.00073
50	42	0.979552	1.00518	0.980869	0.994019	1.00929	1.02687	0.985917	1.00784	1.00166	0.993728	1.0144	1.00163	0.998464	1.00696	1.00461	0.994645	1.00376	1.0008	0.994014	0.983099	0.996248	0.991205	1.00455	1.07983	1.03247	1.03532	1.00418	0.974933	1.00095	1.0044	0.997167	0.991952	0.997844	0.980521	0.95714	1.02606	0.999433	0.989832	0.991383	1.01173	1.01163	1.01024
80	42	1.02623	1.01091	1.02308	0.992888	0.98649	0.990989	1.01303	1.01335	1.00052	1.01858	1.0081	0.99774	0.993228	0.997268	1.00291	1.00377	0.993185	0.998099	1.0023	0.997932	0.991171	1.00175	1.01969	0.951	0.974817	1.00709	1.00571	0.994792	0.999376	1.00152	1.01722	1.00378	0.989367	0.997612	1.0052	1.00327	1.01175	0.992206	1.00514	1.0269	1.03513	0.989032
110	42	0.799096	0.747539	0.894626	0.739324	0.828154	0.843848	0.714612	0.712731	0.678664	0.725203	0.730781	0.628606	0.667383	0.671632	0.869174	0.69643	0.701012	0.685661	0.810892	0.72696	0.721424	0.743211	0.702095	0.768268	0.739072	0.85293	0.776764	0.853408	0.85982	0.779055	0.802915	0.783204	0.768661	0.717905	0.800045	0.692367	0.736765	0.721479	0.870295	0.819408	0.948818	0.635379
140	42	0.91155	0.751419	0.839401	0.814184	0.89196	0.870204	0.806309	0.788362	0.750475	0.80698	0.737157	0.659372	0.721693	0.735154	0.920193	0.768117	0.751135	0.746179	0.825123	0.820007	0.740664	0.794394	0.783694	0.835256	0.782043	0.938425	0.823069	0.802731	0.935354	0.819192	0.887478	0.784495	0.769611	0.74193	0.807144	0.71577	0.780358	0.811921	0.928456	0.90749	0.965585	0.633433
170	42	0.878892	0.810681	0.966804	0.857132	0.88023	0.886862	0.834895	0.779956	0.782789	0.845326	0.729407	0.678415	0.753194	0.77392	0.954337	0.826719	0.74061	0.740774	0.854471	0.817932	0.786593	0.835603	0.824477	0.834463	0.82783	0.903374	0.889187	0.816959	0.891591	0.855799	0.910096	0.804199	0.806718	0.740072	0.831944	0.730185	0.801448	0.842094	0.943582	0.875803	0.984532	0.658104
200	42	0.964556	0.784136	0.936954	0.882543	0.972563	0.817027	0.798873	0.788872	0.809864	0.890373	0.795952	0.687365	0.79407	0.789724	0.972071	0.837857	0.804195	0.759702	0.839462	0.852699	0.782954	0.868072	0.807004	0.877416	0.866638	0.900129	0.880403	0.84666	0.925902	0.859045	0.90843	0.814439	0.854544	0.740351	0.818662	0.75589	0.801262	0.83466	1.05244	0.886022	0.960673	0.643188
240	42	0.942228	0.870086	0.927991	0.913698	0.971335	0.886335	0.837587	0.82931	0.829889	0.867664	0.807831	0.716024	0.808072	0.791004	1.00999	0.845819	0.795951	0.791669	0.864687	0.90673	0.826443	0.860748	0.873686	0.892495	0.881282	0.92194	0.906951	0.846539	0.949411	0.892626	0.94819	0.82839	0.868178	0.839175	0.823447	0.756863	0.883633	0.867791	1.00854	0.925575	0.979773	0.621101
290	42	0.935064	0.817209	0.956823	0.924877	0.926994	0.848941	0.900554	0.79069	0.868218	0.849314	0.83915	0.763679	0.827731	0.829584	0.985678	0.842354	0.82397	0.818249	0.864771	0.901693	0.827267	0.891717	0.866348	0.89224	0.873543	0.949841	0.898579	0.86491	0.918513	0.942033	0.917804	0.778328	0.861542	0.852031	0.844557	0.823184	0.867596	0.895643	0.924266	0.897673	0.950345	0.638251
350	42	1.00543	0.846496	0.960982	0.934047	0.986409	0.864424	0.889339	0.865039	0.860485	0.891565	0.806157	0.744684	0.860268	0.866446	1.01476	0.867866	0.803336	0.821576	0.863906	0.931196	0.862234	0.89526	0.84392	0.87134	0.91956	0.965202	0.93129	0.862624	1.01228	0.918464	0.994844	0.852897	0.862131	0.822132	0.834471	0.778957	0.89823	0.877439	1.03623	0.886142	0.914559	0.647062
400	42	0.903051	0.851686	0.887583	0.931843	0.989709	0.863901	0.909836	0.865574	0.88644	0.918549	0.80907	0.792376	0.857911	0.868333	0.998774	0.882467	0.841359	0.871936	0.869516	0.918632	0.835631	0.879283	0.914293	0.853574	0.928287	0.840237	0.915153	0.886124	0.990065	0.951513	0.940411	0.849911	0.909237	0.867225	0.870656	0.810175	0.886476	0.910747	0.993284	0.934944	0.848216	0.657001
480	42	0.939412	0.884217	0.987649	0.923931	0.981057	0.85842	0.916178	0.889077	0.893678	0.854828	0.852086	0.771817	0.881796	0.89109	0.979457	0.915154	0.848064	0.86343	0.884404	0.928629	0.864045	0.932967	0.941555	0.958104	0.948051	1.00092	0.937678	0.926393	0.976513	0.93178	0.962633	0.890201	0.91474	0.848189	0.879405	0.825485	0.894955	0.900354	0.992892	0.994555	0.918046	0.662131
580	42	1.00954	0.885143	0.923595	0.976632	0.97309	0.885308	0.966953	0.86684	0.923165	0.882039	0.870189	0.790966	0.906366	0.907409	1.01441	0.904218	0.875686	0.8876	0.89843	0.95997	0.864731	0.930317	0.891937	0.956013	0.937128	0.987132	0.951545	0.82643	0.997971	0.994173	0.97037	0.865418	0.913161	0.832645	0.85364	0.852149	0.91654	0.91533	0.994297	0.961036	0.965974	0.649017
900	42	1.00463	0.89115	1.00801	0.95574	1.01678	0.856768	0.988841	0.80701	0.93068	0.900292	0.913084	0.835448	0.947775	0.918485	0.949998	0.953197	0.86683	0.87764	0.921113	0.950092	0.907256	0.971408	0.932142	1.0047	0.981548	0.981593	1.00438	0.888895	0.983889	0.951419	0.97299	0.932696	0.947031	0.934204	0.921819	0.863707	0.938345	0.91746	1.02758	0.936368	0.92782	0.682782
1200	42	0.961341	0.915363	1.07008	0.9855	1.01493	0.895467	1.01314	0.894539	0.936732	1.00251	0.876514	0.852156	0.95767	0.912499	0.987029	0.951653	0.895544	0.928413	0.924331	0.924599	0.919118	0.975335	0.940071	0.893275	1.00053	1.00549	0.957653	0.891609	0.981766	0.98143	0.977998	0.906733	0.934948	0.919	0.954947	0.880304	0.962473	0.938042	1.04309	0.964963	0.906362	0.674581
1800	42	0.98046	0.912859	1.00129	0.973767	0.993567	0.880326	0.960294	0.904393	0.94414	0.929114	0.910817	0.855268	0.929473	0.958167	1.04201	0.938247	0.94969	0.93903	0.9263	0.959716	0.953553	0.967275	0.937744	0.942194	0.98417	0.943881	0.996457	0.927981	0.941378	0.992586	1.0009	0.924253	0.995975	0.950603	0.92338	0.892753	0.968481	0.921566	1.06562	0.932771	0.949991	0.708011
2800	42	1.02111	0.925733	0.917629	0.974682	0.937142	0.933793	0.988089	0.925837	0.95383	0.996258	0.866663	0.87653	0.961008	0.961727	1.03369	0.960115	0.972212	0.985973	0.903699	0.980107	0.920557	0.989749	0.940566	0.938567	0.952884	0.990001	1.01768	0.936315	0.98621	0.993568	0.956163	0.953748	0.979818	0.933273	0.925026	0.933099	0.937388	0.901643	0.979775	0.954237	1.10967	0.716172
4000	42	1.02266	0.974983	0.991249	0.993992	0.988867	0.927217	0.964202	0.963711	0.954637	0.929241	0.85737	0.875186	0.970199	0.994725	1.02812	0.929811	0.976236	0.968164	0.923352	0.942711	0.900502	0.98425	0.94775	0.959131	1.03685	1.03534	0.964812	0.997342	1.00558	0.975181	0.954958	0.968549	0.981642	0.947448	0.940684	0.936085	0.948256	0.93975	1.02656	0.94792	0.943688	0.714702
4970	42	1.03904	0.957193	0.952282	0.990216	0.953792	0.932277	1.00078	0.936001	0.977711	0.998229	0.901456	0.894068	0.966916	0.994888	1.00987	0.981356	0.95412	0.960031	0.874563	0.978072	0.947745	1.02053	0.913058	1.02676	1.05963	0.939469	0.906474	0.933852	0.958506	0.974232	0.963198	0.953423	0.981471	0.899303	0.962994	0.9403	0.945797	0.914316	1.15529	0.965513	0.993587	0.744444
6000	42	0.987049	0.962303	1.02357	0.99336	0.961141	0.946228	0.986422	0.940962	0.959297	0.98537	0.866709	0.893041	0.966347	0.985124	1.04518	0.986801	0.901114	0.979222	0.914283	0.918119	0.937828	0.999324	0.89776	0.925026	1.01593	0.876213	0.92164	0.912399	0.987107	0.977549	0.917318	0.959572	0.994383	0.870991	0.969476	0.927091	0.937333	0.897766	1.17359	0.944418	1.0178	0.747025
7000	42	0.999048	0.887903	0.987375	0.97014	0.984898	0.927035	1.02031	0.932155	0.968762	0.939554	0.898507	0.877159	1.00409	0.965216	1.03381	0.978816	0.972066	0.971234	0.94208	0.953122	0.942351	1.00166	0.878679	0.959304	1.04216	0.948425	0.851821	0.89103	0.968151	0.992357	0.913472	0.945114	0.941434	0.866194	0.919633	0.942149	0.935216	0.898602	1.03041	0.961781	0.92893	0.756894
8000	42	0.944375	0.94435	1.0289	0.970079	0.976822	0.930821	0.944521	0.905215	0.953183	0.903099	0.902848	0.889506	1.00603	0.961844	1.06668	0.967098	1.01148	0.962823	0.928344	0.93329	0.921353	0.999218	0.913307	0.976063	1.01995	1.02591	0.959575	0.955458	0.981284	0.985746	0.902795	0.917188	0.963193	0.853657	0.950275	0.960814	1.00191	0.89783	0.963711	0.993135	0.895714	0.773291
9000	42	1.01576	0.959393	0.906613	0.977542	1.00924	0.949271	0.969469	0.902686	0.964545	0.920475	0.871516	0.889166	0.998242	1.01625	1.04765	0.943238	0.949421	0.957447	0.925513	0.916445	0.981743	1.00334	0.929709	0.932247	1.01606	0.984521	0.948284	1.00606	0.945352	1.03642	0.904583	0.864744	0.984234	0.849964	0.942023	0.917331	0.932321	0.914163	1.04534	0.980428	1.04375	0.766465
9970	42	0.98745	0.955255	0.973288	0.977251	1.03307	0.969903	1.00235	0.894829	0.978663	0.872607	0.902922	0.873505	1.01744	0.978728	1.03814	0.974922	1.00473	0.967805	0.899751	0.934123	0.942072	0.981298	0.897924	0.926723	1.04809	0.882283	0.903389	0.913574	1.01778	1.00326	0.889133	0.897967	1.00169	0.819327	0.924213	0.949916	0.977625	0.924286	0.927434	0.948244	0.949186	0.746102
N	388	7	4	4	18	4	4	7	7	24	3	4	14	12	12	4	14	4	11	12	12	14	24	10	3	9	3	4	7	10	17	7	9	13	8	5	14	14	11	3	7	3	12
Condition: 50 uM Roscovitine (Rosco) 35C
Pulse		MFT #
ms	COUNT	700	703	704	705	706	707	709	710	711	712	713	715	716	717	718	719	720	721	722	800	801	802	803	804	805	806	807	808	902	903	904	905	906	907	908	909	910	911	913	914	915	916	917	918	919
20	45	0.966682	0.99413	1.00746	0.980184	1.00678	0.996049	0.992045	0.98996	1.01579	0.975848	1.01878	1.01992	0.988766	1.01398	0.988046	0.970758	0.999265	0.972512	0.976079	1.0111	1.02682	1.02495	1.00028	0.999468	1.00713	0.987114	0.934229	1.00381	0.98468	1.01445	0.985939	1.0378	1.02576	0.981757	1.00565	1.0129	0.97062	0.988415	0.993778	1.0093	1.00403	0.99366	1.00915	1.02262	0.992575
50	45	1.04539	1.01779	0.995314	1.00849	0.993485	0.999786	1.02166	0.979513	0.980895	1.01277	0.981473	1.01606	1.00859	0.976029	1.03052	1.00128	0.99944	1.02283	0.986186	0.98108	1.00801	0.956436	1.00784	1.00851	1.01823	1.031	1.02534	0.990788	1.00109	0.998106	1.03288	0.938579	0.994909	1.00928	1.0159	0.981994	1.01853	0.993752	1.03176	0.978621	1.00526	1.0081	0.952181	0.954841	0.990854
80	45	0.987932	0.988081	0.997227	1.01133	0.999739	1.00416	0.986294	1.03053	1.00332	1.01138	0.99975	0.964018	1.00265	1.00999	0.981434	1.02797	1.00129	1.00466	1.03773	1.00782	0.965164	1.01861	0.991879	0.992018	0.974638	0.981883	1.04043	1.00541	1.01423	0.987444	0.981179	1.02362	0.979333	1.00896	0.978447	1.0051	1.01085	1.01783	0.974465	1.01208	0.99071	0.998242	1.03867	1.02254	1.01657
110	45	0.607195	0.677879	0.709448	0.630725	0.636775	0.624532	0.641017	0.599325	0.679264	0.636498	0.712453	0.496555	0.671504	0.537239	0.694447	0.813277	0.63993	0.730862	0.678342	0.61523	0.662194	0.699959	0.58984	0.707456	0.605732	0.762116	0.852309	0.780698	0.868044	0.59253	0.62812	0.701005	0.607236	0.8835	0.576631	0.593551	0.66062	0.721512	0.557037	0.712225	0.843756	0.719984	0.771322	0.807677	0.885854
140	45	0.595539	0.671752	0.734644	0.651393	0.654273	0.632365	0.641418	0.622146	0.662045	0.654172	0.714213	0.534078	0.670487	0.53959	0.770955	0.827169	0.657256	0.754136	0.68242	0.614688	0.612592	0.793166	0.592515	0.728557	0.643881	0.722278	0.806047	0.795054	0.778843	0.5797	0.633097	0.70973	0.621873	0.794623	0.582009	0.648852	0.744071	0.770156	0.638167	0.746624	0.837332	0.689597	0.771172	0.855413	0.893293
170	45	0.59981	0.716745	0.75132	0.679775	0.682967	0.657709	0.665095	0.665363	0.6862	0.664353	0.705419	0.544825	0.715085	0.564747	0.717674	0.834494	0.6724	0.732389	0.687544	0.632634	0.668114	0.760307	0.609423	0.753932	0.681055	0.864733	0.903068	0.807336	0.817184	0.578537	0.659433	0.693046	0.665518	0.777321	0.552011	0.657392	0.743199	0.839558	0.646991	0.755662	0.815314	0.709637	0.831058	0.827662	0.820976
200	45	0.61147	0.683209	0.729397	0.676161	0.684872	0.674166	0.645762	0.644031	0.692305	0.67551	0.714871	0.555702	0.711677	0.586397	0.69398	0.863186	0.663325	0.777242	0.699728	0.651121	0.65079	0.795484	0.61654	0.752126	0.684043	0.791993	0.893477	0.855161	0.855751	0.584297	0.693045	0.754348	0.636023	0.855885	0.565322	0.662173	0.746681	0.772953	0.624947	0.732432	0.831542	0.72126	0.87385	0.831547	0.902241
240	45	0.630265	0.715923	0.780628	0.637763	0.717547	0.658458	0.652548	0.656985	0.712563	0.672723	0.723057	0.617627	0.736851	0.589495	0.710955	0.793152	0.703313	0.791417	0.748969	0.659158	0.681238	0.811214	0.645431	0.753387	0.699635	0.837568	0.865543	0.827268	0.872663	0.557013	0.693236	0.737531	0.653902	0.843011	0.611511	0.707728	0.737338	0.705452	0.671623	0.768156	0.82387	0.73029	0.829431	0.864424	0.854872
290	45	0.67578	0.729825	0.785971	0.672488	0.710983	0.676302	0.723079	0.732713	0.704102	0.677659	0.760788	0.626382	0.724871	0.608923	0.75593	0.878005	0.692726	0.744881	0.778514	0.706275	0.704491	0.829842	0.631904	0.794996	0.735121	0.79577	0.826069	0.850438	0.867494	0.553118	0.71448	0.739724	0.700769	0.845854	0.635729	0.671153	0.695701	0.735064	0.685347	0.71541	0.911907	0.742277	0.937181	0.810928	0.939663
350	45	0.681338	0.724841	0.799329	0.68059	0.73975	0.65797	0.675939	0.704511	0.693066	0.716868	0.760921	0.616929	0.738645	0.625818	0.751964	0.876004	0.714676	0.786351	0.765168	0.706037	0.725871	0.824017	0.67416	0.821479	0.745853	0.821283	0.882365	0.877676	0.916536	0.561554	0.73929	0.765515	0.702175	0.876903	0.652943	0.677964	0.734675	0.799735	0.741946	0.693547	0.877728	0.725315	0.961704	0.924973	0.897956
400	45	0.684563	0.73591	0.816864	0.644024	0.748689	0.685924	0.717173	0.706197	0.707663	0.712133	0.753362	0.650937	0.75587	0.610184	0.765999	0.875403	0.735105	0.825535	0.769132	0.701426	0.731868	0.822867	0.658562	0.846778	0.738449	0.823303	0.931155	0.881241	0.91258	0.581694	0.755032	0.762605	0.677689	0.87579	0.636828	0.709926	0.75775	0.837542	0.704308	0.76435	0.856144	0.752859	0.869769	0.870237	0.909064
480	45	0.698833	0.753072	0.835063	0.648583	0.77676	0.716561	0.741507	0.729005	0.75913	0.731259	0.776265	0.660511	0.798745	0.639969	0.763696	0.845546	0.736195	0.840858	0.719007	0.727791	0.752703	0.841339	0.666878	0.792093	0.765467	0.854835	0.889676	0.942519	0.857088	0.558292	0.776165	0.732869	0.721366	0.79242	0.628436	0.76025	0.747519	0.829477	0.765152	0.717523	0.857602	0.752943	0.918556	0.910058	0.871134
580	45	0.711793	0.780846	0.853863	0.674261	0.77645	0.706945	0.740203	0.76858	0.740901	0.745105	0.81273	0.702255	0.785068	0.655664	0.760876	0.871256	0.761553	0.79951	0.854524	0.724048	0.736547	0.874996	0.693862	0.805245	0.785906	0.759573	0.873918	0.894806	0.866029	0.561238	0.797584	0.742886	0.751232	0.902917	0.645078	0.659867	0.713984	0.841703	0.745652	0.73264	0.859374	0.770453	0.93546	0.879525	0.884412
900	45	0.771512	0.805921	0.874619	0.679974	0.790876	0.723899	0.819264	0.828151	0.789447	0.771649	0.840353	0.716605	0.802837	0.702711	0.846768	0.930611	0.80581	0.871597	0.849507	0.771616	0.797395	0.891142	0.736785	0.900483	0.845388	0.839895	0.926431	0.919803	0.971542	0.547609	0.85278	0.758407	0.806226	0.879041	0.689808	0.733093	0.96757	0.863586	0.691239	0.684201	0.936274	0.793169	0.953152	0.917743	0.918628
1200	45	0.72191	0.848042	0.917488	0.710104	0.842475	0.760898	0.767152	0.785762	0.8	0.78888	0.856411	0.787606	0.84621	0.755126	0.849118	0.912821	0.807312	0.851217	0.809002	0.781905	0.780548	0.917778	0.738701	0.903485	0.859412	0.874679	0.96058	0.948982	0.949479	0.551794	0.857923	0.74409	0.87599	0.87183	0.779016	0.730878	0.907606	0.861736	0.720396	0.662846	0.924563	0.802959	1.02065	0.907423	0.985187
1800	45	0.73484	0.824572	0.922203	0.67637	0.86804	0.756599	0.783196	0.851205	0.827191	0.822836	0.866347	0.746697	0.87667	0.79726	0.847942	0.978092	0.858143	0.867605	0.886664	0.815727	0.777096	0.892357	0.789388	0.892104	0.899094	0.924196	0.949403	0.903924	0.974537	0.591055	0.881451	0.841196	0.878057	0.759279	0.807201	0.779012	0.987085	0.920081	0.67549	0.680896	0.912006	0.820801	1.02195	0.97353	0.927833
2800	45	0.723431	0.862882	0.956785	0.709425	0.868684	0.808341	0.85124	0.871614	0.870224	0.858315	0.878053	0.828113	0.875903	0.824135	0.827792	0.93972	0.87677	0.889994	0.872734	0.866594	0.841719	0.925836	0.823407	0.906869	0.880557	0.878054	0.957489	0.921432	0.922529	0.610529	0.860777	0.804417	0.874392	0.850326	0.774144	0.777907	0.905314	0.926255	0.667772	0.724922	0.946025	0.865018	1.0364	0.946411	0.917822
4000	45	0.7217	0.8808	0.962496	0.717414	0.900266	0.810093	0.880212	0.930934	0.879712	0.898938	0.925679	0.816656	0.896739	0.845762	0.875831	0.949835	0.883366	0.831291	0.95128	0.871036	0.865065	0.950266	0.845273	0.900529	0.929135	0.866565	0.996026	0.889133	0.99882	0.620208	0.909337	0.871966	0.914507	0.909055	0.758356	0.848827	0.818945	0.857721	0.78619	0.763525	0.910842	0.879189	1.12056	0.969271	0.988825
4970	45	0.774318	0.871263	0.945931	0.72602	0.892157	0.825479	0.958657	0.902116	0.839568	0.900607	0.902443	0.827023	0.948691	0.854496	0.883172	1.00103	0.887825	0.870952	0.914393	0.879602	0.947951	0.957116	0.831249	0.926353	0.912588	0.993005	0.973286	0.914414	0.998748	0.650359	0.954941	0.823813	0.957462	0.868742	0.820805	0.819991	0.934428	0.915181	0.851828	0.697556	0.900391	0.872503	1.00311	0.935107	0.97679
6000	45	0.748233	0.888156	0.971154	0.725937	0.921109	0.84927	0.931255	0.925547	0.914377	0.876027	0.909061	0.845025	0.947434	0.861209	0.843335	0.979434	0.925813	0.837959	0.92971	0.894907	0.90732	0.991295	0.849844	0.935053	0.936573	0.90953	0.901777	0.942579	0.945678	0.641729	0.970201	0.85383	0.964585	0.902021	0.776356	0.760749	0.997577	0.904114	0.911822	0.69858	0.929049	0.915365	0.999004	0.957192	0.994514
7000	45	0.813251	0.901661	0.944172	0.744842	0.924715	0.841625	0.90587	0.962803	0.934879	0.907368	0.945438	0.842985	0.951595	0.88579	0.88631	0.987891	0.882579	0.878954	0.883771	0.913674	0.968326	0.935273	0.85873	0.927452	0.929093	0.91069	0.977379	0.869765	0.964366	0.675824	0.960001	0.836537	1.00727	0.905244	0.848999	0.7455	0.867274	0.905505	1.00454	0.692856	0.880766	0.92194	0.939124	0.989446	0.982688
8000	45	0.869627	0.92118	0.971679	0.730546	0.930656	0.875572	0.883329	0.973608	0.911484	0.896724	0.924272	0.878286	0.934774	0.905023	0.894921	0.994505	0.907047	0.899313	0.903461	0.90163	0.932893	0.996479	0.86507	0.94786	0.899344	0.917583	0.904795	0.899034	0.9751	0.625277	0.957572	0.864738	1.02707	0.894121	0.888887	0.746357	0.947872	0.8367	0.884967	0.677646	0.888251	0.916556	0.95873	0.924541	1.01888
9000	45	0.811429	0.914755	0.965618	0.722649	0.937486	0.878919	0.891195	1.0021	0.92103	0.907127	0.956743	0.863129	0.954735	0.884501	0.876919	0.995457	0.896477	0.839433	0.897174	0.951817	0.960684	0.95053	0.853212	0.938296	0.921748	0.870291	0.945095	0.890823	0.990772	0.662654	0.915653	0.848784	0.957315	0.928959	0.846294	0.864442	0.899729	0.882378	0.935575	0.737503	0.862191	0.928202	1.06326	0.944802	1.006
9970	45	0.883693	0.875558	0.957237	0.739996	0.942894	0.848585	0.93287	0.947904	0.905531	0.893865	0.981662	0.850306	0.96075	0.901309	0.945848	0.948609	0.925247	0.895495	0.865113	0.911858	0.985674	0.937484	0.863886	0.932696	0.896302	0.948479	0.898084	0.877931	0.949987	0.662234	0.929241	0.92064	1.04291	0.838836	0.812502	0.852754	0.970264	0.858852	0.904601	0.698385	0.905161	0.935241	1.03157	0.959682	1.02002
N	374	6	18	23	6	24	12	6	5	12	18	12	3	5	10	5	5	10	9	5	15	10	5	10	9	10	5	5	5	10	10	10	5	10	5	5	4	4	4	5	5	5	13	3	5	3
Condition: Fixed tissue, 35C
Pulse		MFT #
ms	COUNT	1700	1701	1702	1703	1704	1705	1706	1707	1708	1710	1711	1712	1713	1714	1715	1716	1717
20	17	0.98364	1.02461	0.973547	1.00432	0.999462	0.974948	0.941158	0.997983	1.00702	1.01433	1.0014	0.931607	1.00177	1.01784	1.03256	1.00002	1.00417
50	17	0.983041	0.974671	1.03362	0.985682	1.00084	1.01253	1.04287	0.995447	1.00678	0.99967	0.969061	1.0159	0.99321	0.985254	0.987002	0.985298	0.996452
80	17	1.03332	1.00072	0.992834	1.01	0.999693	1.01252	1.01597	1.00657	0.986197	0.986001	1.02954	1.05249	1.00502	0.996903	0.98044	1.01468	0.999377
110	17	0.686274	0.628389	0.707403	0.596914	0.677198	0.675868	0.647302	0.666857	0.6727	0.652016	0.642142	0.867932	0.773376	0.771052	0.688691	0.668015	0.686576
140	17	0.661719	0.622635	0.692054	0.575114	0.689061	0.648981	0.730412	0.737038	0.685696	0.653638	0.642864	0.89076	0.673912	0.764008	0.641738	0.664829	0.689242
170	17	0.687765	0.599753	0.746731	0.572623	0.65488	0.717557	0.773697	0.6618	0.68159	0.663742	0.616357	0.906327	0.717401	0.701855	0.663149	0.650386	0.686893
200	17	0.678012	0.624983	0.701304	0.558729	0.659941	0.696595	0.637772	0.744596	0.665637	0.681101	0.625952	0.854054	0.707763	0.714313	0.646223	0.641949	0.668238
240	17	0.678421	0.650556	0.72645	0.577366	0.675754	0.675111	0.625064	0.674501	0.659055	0.679794	0.630009	0.830712	0.698348	0.762581	0.615424	0.652011	0.688881
290	17	0.659906	0.60108	0.689783	0.580803	0.701387	0.639819	0.622294	0.722003	0.657345	0.66094	0.598582	0.876315	0.687237	0.731225	0.650818	0.646615	0.685403
350	17	0.672039	0.6192	0.700229	0.567545	0.658501	0.731315	0.678305	0.647205	0.659535	0.670439	0.628547	0.925154	0.717472	0.710819	0.629263	0.653495	0.683757
400	17	0.590287	0.611449	0.712457	0.559731	0.663484	0.72096	0.598281	0.712242	0.675693	0.643189	0.621196	0.86338	0.782926	0.745021	0.677937	0.654134	0.681128
480	17	0.636167	0.613251	0.690872	0.581211	0.658729	0.689896	0.705433	0.657032	0.650461	0.670238	0.623741	0.910243	0.750237	0.719229	0.632786	0.652547	0.675271
580	17	0.65974	0.593805	0.690802	0.557382	0.62948	0.616434	0.652518	0.672221	0.6225	0.64896	0.609078	0.789869	0.730165	0.719201	0.648286	0.6549	0.676203
900	17	0.639909	0.600899	0.720477	0.591243	0.684338	0.674703	0.651906	0.675029	0.668288	0.65424	0.610991	0.876167	0.747899	0.723076	0.652992	0.646427	0.658663
1200	17	0.729086	0.639173	0.71956	0.570645	0.65899	0.704445	0.762006	0.705168	0.64542	0.635639	0.599876	0.789126	0.759294	0.720875	0.676367	0.650519	0.657853
1800	17	0.775245	0.595793	0.72706	0.591963	0.669486	0.672186	0.724806	0.655043	0.630436	0.687773	0.619881	0.751006	0.710166	0.635823	0.653727	0.671916	0.66884
2800	17	0.747094	0.551707	0.757469	0.588177	0.67143	0.670543	0.748008	0.628422	0.655814	0.688849	0.606801	0.767955	0.666089	0.743909	0.673623	0.668946	0.69928
4000	17	0.790986	0.580785	0.714965	0.606659	0.675437	0.686688	0.76655	0.695441	0.657297	0.682529	0.634966	0.641868	0.668546	0.79277	0.688623	0.674282	0.663447
4970	17	0.754114	0.528088	0.698728	0.62938	0.699334	0.732071	0.823811	0.726896	0.683098	0.688326	0.623713	0.802976	0.678019	0.78074	0.634806	0.674429	0.682655
6000	17	0.688985	0.595532	0.702259	0.656854	0.681211	0.666014	0.793915	0.792467	0.678149	0.739968	0.652265	0.856091	0.607406	0.754942	0.657351	0.67482	0.686326
7000	17	0.692495	0.561144	0.694623	0.642193	0.671859	0.759223	0.832429	0.736159	0.656915	0.729767	0.632578	0.819672	0.657615	0.738474	0.704362	0.685783	0.689388
8000	17	0.64841	0.581088	0.719585	0.645654	0.696107	0.769764	0.820417	0.739464	0.674764	0.740385	0.634311	0.844835	0.646538	0.771599	0.636616	0.692653	0.702162
9000	17	0.722271	0.579464	0.740944	0.645741	0.679251	0.793669	0.874191	0.794687	0.667028	0.713305	0.642971	0.908806	0.727077	0.764132	0.65335	0.700006	0.668276
9970	17	0.730901	0.579563	0.762498	0.626844	0.686864	0.820481	0.855564	0.743397	0.669205	0.751764	0.667939	1.03464	0.650154	0.714928	0.680799	0.685623	0.673089
N	168	5	10	9	15	10	5	5	5	14	14	14	3	5	9	5	23	17
[truncated: 14 more columns]
