# Supplementary material for: Physical determinants of vesicle mobility and supply at a central synapse
Source: eLife. 2016 Aug 19;5:e15133. doi: 10.7554/eLife.15133 (PMC5025287; doi:10.7554/eLife.15133)
Supplement: Figure 2—source data 2. — DOI: http://dx.doi.org/10.7554/eLife.15133.006 [file elife-15133-fig2-data2.xlsx]

## Sheet: FRAP F1s and F5s
"Physical determinants of vesicle mobility and supply at a central synapse"
Rothman et al. 2016
Figures 1C, 2A, 2B and Results (Modulation of vesicle mobility)
Source data
Title: Average percent fluorescence recovered at 1 s and 5 s after bleaching
			COUNT	AVERAGE	STDV	SEM	FTEST	TTEST
Figure 1C	Control 35C	f1s	62	34.6904	15.0349	1.90943			20.1406	34.2688	26.3555	19.7485	-8.5904	14.1952	18.593	26.4078	26.8328	5.83547	28.2627	69.8579	35.9215	16.2073	52.1346	12.609	61.7548	23.2389	7.38599	28.8144	48.7323	34.6812	27.1508	36.8932	29.246	39.8494	46.8666	41.0633	37.3884	29.5654	37.6512	44.4751	30.6817	25.8077	48.0468	54.2738	51.5726	43.7228	39.3221	48.5618	27.9545
Figure 1C	Control 35C	f5s	62	62.5986	18.3478	2.33018			37.3722	44.1423	60.0281	-1.32836	32.7803	42.4299	50.7757	54.4107	62.4861	32.7492	59.6614	95.6329	68.3265	42.9872	79.9228	21.0991	76.72	45.3293	17.7634	55.4596	81.5237	60.6623	59.0238	71.8121	61.8138	101.501	81.4024	72.6089	69.3043	67.5929	67.7284	61.6188	62.1883	62.0699	99.845	59.1181	73.9293	62.8559	64.0946	66.5679	54.0978
Results	21C	f1s	36	24.6207	17.1483	2.85805	0.36341	0.00310268	6.40976	12.0058	33.1071	47.2048	-4.01756	7.77107	16.2996	18.7969	38.7985	17.7435	18.6306	50.0064	-7.37946	18.122	45.1622	33.1386	51.2947	33.524	27.7844	13.2616	15.7612	30.2923	41.1196	-4.30894	22.7099	44.6191	34.858	9.96231	50.741	35.7323	19.9782	19.9042	36.4534	7.72562	47.6076	-4.47476
Results	CD+LB 10uM	f1s	60	45.0471	14.9761	1.93341	0.977052	0.000219778	29.5931	47.6036	48.0585	47.9981	53.084	54.3767	19.7819	37.4483	42.917	50.2675	70.3004	54.2917	43.2731	57.5742	43.3045	24.7354	45.293	21.4005	36.8349	21.4354	51.4371	30.5744	45.2202	79.4358	25.5652	61.1716	27.8822	39.3747	54.0327	56.9712	37.7643	35.204	63.7759	67.3356	50.8099	45.3742	65.8281	56.1351	47.8277	54.4419	17.8466
Results	Jasplakinolide 2um	f1s	20	31.2177	12.0038	2.68414	0.276053	0.350271	38.2147	33.5155	32.1684	34.147	40.5479	13.0687	33.6424	33.8035	36.7195	28.1443	-4.8805	20.6604	38.808	42.2011	39.4413	23.0601	47.2333	41.1565	32.5028	20.1988
Results	Jasplakinolide 5um	f1s	44	27.1365	12.0061	1.80998	0.121808	0.00674964	32.9844	19.9704	26.5756	21.6629	24.1174	39.075	39.1536	49.3285	36.9258	35.8863	1.9545	37.7636	33.6387	38.0504	28.707	-0.0442927	11.0902	33.0545	28.5499	33.5118	-6.36569	8.06421	22.9454	19.0343	33.0095	36.0255	29.7348	26.7539	46.6853	34.0055	9.01049	33.154	28.653	39.2902	36.586	36.7516	28.4169	17.7342	17.2705	34.1351	24.8283
Results	Okadaic acid 2uM	f1s	42	64.0823	33.4429	5.16034	2.21635e-08	2.03034e-06	84.7074	55.5652	98.1196	81.224	96.9109	6.22908	85.6009	46.744	71.7078	58.4363	56.845	48.084	73.6337	69.802	93.6567	71.4253	58.0657	63.4594	47.5474	73.8315	60.7652	78.6821	68.9836	73.7678	86.3078	84.0829	82.1182	38.6574	77.3046	83.6676	82.7125	54.0808	73.0558	61.3526	50.0621	52.2604	71.8938	60.8733	128.753	68.2395	-96.9863
Results	Roscovitine 50 uM	f1s	45	37.8017	16.9024	2.51966	0.393864	0.318306	31.7998	36.5346	55.4979	6.90509	44.7127	26.1965	34.5153	44.0894	33.1615	34.5285	41.3841	41.6096	43.3377	35.9874	31.5775	47.2433	39.9666	41.0273	44.4383	37.8127	34.4029	53.1948	31.7483	47.6636	52.6022	31.155	45.2785	62.0725	57.3087	-5.18512	53.6334	20.9645	47.5039	12.4594	32.5026	27.0918	52.3839	38.6863	27.3416	-16.2507	39.2157
	CD + LB: 10 uM cytochalasin-D plus 10 uM latrunculin-B
	f1s: average 0.4-1.7 s
	f5s: average 2.7-6.9 s
[truncated: 21 more columns]
