# Supplementary material for: Physical determinants of vesicle mobility and supply at a central synapse
Source: eLife. 2016 Aug 19;5:e15133. doi: 10.7554/eLife.15133 (PMC5025287; doi:10.7554/eLife.15133)
Supplement: Figure 3—figure supplement 1—source data 1. — DOI: http://dx.doi.org/10.7554/eLife.15133.014 [file elife-15133-fig3-figsupp1-data1.xlsx]

## Sheet: MFT Vesicle Diameters
"Physical determinants of vesicle mobility and supply at a central synapse"
Rothman et al. 2016
Figure 3-figure supplement 1E
Source data
Title: Synaptic vesicle diameters computed from three EM tomographic subvolumes of MFTs
	COUNT	256				COUNT	256
	AVG diameter	0.0410521	um			AVG volume	3.71723e-05	um^3
	STDV diameter	0.00377411	um			STDV volume	1.13634e-05	um^3
	SEM diameter	0.000235882	um			SEM volume	7.10214e-07	um^3
						Diameter	0.041407	um
		Vesicle diameter (um)					Vesicle volume (um^3)
		AZ1	AZ2	AZ3			AZ1	AZ2	AZ3
		0.0349722	0.0369936	0.0400548			2.23959e-05	2.6508e-05	3.36482e-05
		0.0452165	0.0341782	0.0395527			4.84049e-05	2.09048e-05	3.23987e-05
		0.0437608	0.0380325	0.0451691			4.38789e-05	2.88048e-05	4.82528e-05
		0.0339506	0.041582	0.0403464			2.049e-05	3.76458e-05	3.43885e-05
		0.040496	0.0397802	0.042582			3.47724e-05	3.29609e-05	4.04275e-05
		0.0367114	0.0349146	0.0399445			2.59061e-05	2.22855e-05	3.33712e-05
		0.0387577	0.0409772	0.0549419			3.0484e-05	3.60268e-05	8.68377e-05
		0.0429812	0.0400567	0.0401578			4.15752e-05	3.3653e-05	3.39086e-05
		0.0371875	0.0397815	0.0385195			2.69271e-05	3.29643e-05	2.99256e-05
		0.0415288	0.0394557	0.0404815			3.75013e-05	3.21609e-05	3.4735e-05
		0.0418226	0.0381469	0.0389818			3.83029e-05	2.90655e-05	3.10159e-05
		0.0394736	0.0407915	0.036253			3.22047e-05	3.55393e-05	2.49478e-05
		0.0403845	0.0366839	0.041281			3.44861e-05	2.58478e-05	3.6834e-05
		0.0424792	0.0422265	0.0445868			4.01354e-05	3.94234e-05	4.64106e-05
		0.0386149	0.0390754	0.0362299			3.01483e-05	3.12398e-05	2.48999e-05
		0.0387576	0.0350837	0.0403922			3.04837e-05	2.26108e-05	3.45056e-05
		0.0371756	0.0349317	0.0404497			2.69011e-05	2.2318e-05	3.46533e-05
		0.0401161	0.0475547	0.038663			3.3803e-05	5.63091e-05	3.02613e-05
		0.0365731	0.042391	0.0389191			2.56145e-05	3.98861e-05	3.08665e-05
		0.0380151	0.0387436	0.0363906			2.87651e-05	3.04507e-05	2.5233e-05
		0.0371476	0.0414504	0.0385248			2.68406e-05	3.72895e-05	2.99378e-05
		0.0377466	0.0383927	0.0379268			2.81601e-05	2.96309e-05	2.85653e-05
		0.047191	0.0410707	0.0489838			5.50269e-05	3.6274e-05	6.15398e-05
		0.038358	0.0465161	0.0449419			2.95505e-05	5.26999e-05	4.75282e-05
		0.0444551	0.0378616	0.0401649			4.60007e-05	2.8418e-05	3.39265e-05
		0.0444539	0.0406521	0.037087			4.59967e-05	3.51762e-05	2.67094e-05
		0.0404999	0.0402056	0.0416634			3.47826e-05	3.40298e-05	3.78672e-05
		0.0406144	0.0448954	0.0364357			3.50783e-05	4.7381e-05	2.53268e-05
		0.0531918	0.0415592	0.0405943			7.88012e-05	3.75838e-05	3.50263e-05
		0.0445272	0.041249	0.0361368			4.62246e-05	3.67486e-05	2.47087e-05
		0.0452055	0.0364064	0.0416827			4.83696e-05	2.52658e-05	3.79197e-05
		0.0383698	0.0416745	0.0383582			2.95779e-05	3.78976e-05	2.9551e-05
		0.0380219	0.0406555	0.037907			2.87806e-05	3.51849e-05	2.85206e-05
		0.0447655	0.0382912	0.0485031			4.69709e-05	2.93966e-05	5.97458e-05
		0.0489813	0.0405688	0.0376143			6.15304e-05	3.49602e-05	2.7865e-05
		0.0406551	0.0391813	0.0416356			3.51839e-05	3.14945e-05	3.77914e-05
		0.0407165	0.0370683	0.0395571			3.53435e-05	2.6669e-05	3.24096e-05
		0.0412318	0.0419675	0.0461347			3.67025e-05	3.87023e-05	5.1414e-05
		0.0443123	0.0503337	0.0397454			4.55587e-05	6.67692e-05	3.28745e-05
		0.0436556	0.0394813	0.0404245			4.35632e-05	3.22235e-05	3.45884e-05
		0.0426781	0.0400201	0.0412832			4.07018e-05	3.35607e-05	3.68399e-05
		0.0386972	0.0367072	0.0409191			3.03415e-05	2.58972e-05	3.58738e-05
		0.0405283	0.0421141	0.042534			3.48558e-05	3.91094e-05	4.02909e-05
		0.0403605	0.0384389	0.0379724			3.44245e-05	2.9738e-05	2.86682e-05
		0.0364413	0.035064	0.041001			2.53385e-05	2.25728e-05	3.60896e-05
		0.0536338	0.0399088	0.0364137			8.07822e-05	3.32818e-05	2.52809e-05
		0.0473338	0.0337393	0.0364504			5.55281e-05	2.01098e-05	2.53573e-05
		0.0408025	0.0387572	0.037309			3.5568e-05	3.04829e-05	2.71919e-05
		0.0421289	0.0409038	0.0403039			3.91507e-05	3.58334e-05	3.42798e-05
		0.0392048	0.0375037	0.0466623			3.15514e-05	2.76198e-05	5.3198e-05
		0.0394335	0.0425477	0.0425073			3.21066e-05	4.033e-05	4.02151e-05
		0.0400529	0.0377137	0.0360894			3.36434e-05	2.80864e-05	2.46116e-05
		0.0399188	0.0436249	0.0448109			3.33065e-05	4.34714e-05	4.7114e-05
		0.0378184	0.0379034	0.0387911			2.8321e-05	2.85124e-05	3.0563e-05
		0.0410788	0.0429834	0.0365354			3.62954e-05	4.15814e-05	2.55353e-05
		0.0453284	0.0559801	0.0441019			4.8765e-05	9.18543e-05	4.49128e-05
		0.0434863	0.0354435	0.0414395			4.30581e-05	2.33136e-05	3.72598e-05
		0.040558	0.0409541	0.0476787			3.49325e-05	3.59658e-05	5.67508e-05
		0.0382096	0.0358393	0.038349			2.9209e-05	2.41034e-05	2.95298e-05
		0.0420509	0.035968	0.03951			3.89336e-05	2.43639e-05	3.22937e-05
		0.0433498	0.0358454	0.0385961			4.2654e-05	2.41156e-05	3.01043e-05
		0.0405522	0.046067	0.0411499			3.49174e-05	5.11879e-05	3.64842e-05
		0.0441439	0.0390014	0.036832			4.50413e-05	3.10627e-05	2.61621e-05
		0.0444754	0.0374218	0.0453105			4.60638e-05	2.74394e-05	4.87073e-05
		0.0423859	0.0388005	0.0394967			3.98717e-05	3.05851e-05	3.22614e-05
		0.0432284	0.038358	0.0438187			4.22967e-05	2.95505e-05	4.40532e-05
		0.0381632	0.0441124	0.0446957			2.91028e-05	4.49451e-05	4.67517e-05
		0.0449008	0.0377479	0.0446137			4.73981e-05	2.81629e-05	4.64947e-05
		0.0441399	0.0390182	0.0430581			4.50292e-05	3.11027e-05	4.17987e-05
		0.0420092	0.0394664	0.0441185			3.8818e-05	3.2187e-05	4.49636e-05
		0.0455364	0.043094	0.0393486			4.94394e-05	4.19034e-05	3.18997e-05
		0.0457555	0.0401106	0.0377131			5.01567e-05	3.37891e-05	2.80851e-05
		0.0437037	0.0440589	0.0431373			4.37074e-05	4.47816e-05	4.20298e-05
		0.0451801	0.0409269	0.045598			4.82881e-05	3.58943e-05	4.96405e-05
		0.0425893	0.0379093	0.0409849			4.04484e-05	2.85256e-05	3.60471e-05
		0.0426026	0.0404824	0.0439647			4.04863e-05	3.47373e-05	4.4495e-05
		0.0464968	0.0442026	0.055683			5.26342e-05	4.52214e-05	9.03996e-05
		0.0465081	0.0399581	0.0395374			5.26727e-05	3.34053e-05	3.23611e-05
		0.0415933		0.0426211			3.76763e-05		4.05388e-05
		0.0418192		0.0432565			3.82936e-05		4.23791e-05
				0.0448489					4.72339e-05
				0.04291					4.13689e-05
				0.040094					3.37473e-05
				0.0380255					2.87887e-05
				0.0398187					3.30567e-05
				0.0426291					4.05618e-05
				0.0414573					3.7308e-05
				0.0418998					3.85154e-05
				0.0408232					3.56221e-05
				0.0554083					8.90683e-05
				0.0387611					3.04921e-05
				0.0430992					4.19184e-05
				0.0396694					3.26864e-05
				0.0405387					3.48827e-05
				0.038307					2.9433e-05
				0.0438049					4.40114e-05
				0.0432092					4.22403e-05
				0.0403958					3.45148e-05
