# Supplementary material for: Physical determinants of vesicle mobility and supply at a central synapse
Source: eLife. 2016 Aug 19;5:e15133. doi: 10.7554/eLife.15133 (PMC5025287; doi:10.7554/eLife.15133)
Supplement: Figure 3—source data 1. — DOI: http://dx.doi.org/10.7554/eLife.15133.012 [file elife-15133-fig3-data1.xlsx]

## Sheet: MFT Center EM
"Physical determinants of vesicle mobility and supply at a central synapse"
Rothman et al. 2016
Figure 3B
Source data
Title: Density of vesicles and mitochondria (mito) computed from electron micrographs from 3 MFTs
Vesicle density is computed for non-mitochondrial volume
EM slice thickness	0.03	um		vesicle radius	0.0219035	um
				vesicle volume	4.40179e-05	um^3
	3D	2D	3D
	vesicles/um^3	vesicles/um^2	vesicle volume %	mito volume %
EM series 14	4369.56	131.087	0.192339	0.357
EM series 15	3903.97	117.119	0.171844	0.274
EM series 16	3515.37	105.461	0.154739	0.212
COUNT	3	3	3	3
AVERAGE	3929.63	117.889	0.172974	0.281
STDEV	427.675	12.8303	0.0188254	0.072753
STDEV n=3	454.299	13.629	0.0199973	0.077282		C4	0.886227	bias correction factor for n=3
SEM	246.919	7.40756	0.0108688	0.042004
SEM n=3	262.29	7.86869	0.0115454	0.0446188
