# Supplementary material for: Physical determinants of vesicle mobility and supply at a central synapse
Source: eLife. 2016 Aug 19;5:e15133. doi: 10.7554/eLife.15133 (PMC5025287; doi:10.7554/eLife.15133)
Supplement: Figure 6—source data 1. — DOI: http://dx.doi.org/10.7554/eLife.15133.022 [file elife-15133-fig6-data1.xlsx]

## Sheet: EM AZ data
Physical determinants of vesicle mobility and supply at a central synapse								vesicle radius		0.0219035	um
Rothman et al. 2016								vesicle volume		4.40179e-05	um^3
Figure 6
Source data
Title: AZ area and vesicle densities from 3D AZ reconstructions
EM series #		1	3	4	4	4	4	5	10	10	10	10	10	16	18
AZ #		1	1	1	2	3	4	1	1	2	3	4	5	1	1
																COUNT	AVERAGE	STDEV	SEM	MIN	MAX
AZ area (um^2)		0.0156874	0.0190901	0.00990139	0.0186805	0.0112515	0.0091365	0.0386088	0.020593	0.0123286	0.016585	0.0213987	0.0111813	0.0157558	0.0195815	14	0.0171271	0.0074277	0.00198514	0.0091365	0.0386088
diameter (if it was a disc) (nm)		0.141329	0.155905	0.11228	0.154223	0.119691	0.107856	0.221717	0.161925	0.125289	0.145316	0.165063	0.119317	0.141636	0.157898	14	0.14496	0.0292319	0.00781256	0.107856	0.221717
radius (um)		0.0706643	0.0779524	0.0561401	0.0771116	0.0598454	0.0539281	0.110858	0.0809626	0.0626444	0.0726578	0.0825313	0.0596584	0.0708182	0.0789492	14	0.0724802	0.014616	0.00390628	0.0539281	0.110858
	bin (um)
	0.011	1	0	1	3	1	0	5	3	1	0	8	3	1	6	14	2.35714	2.46848	0.65973
	0.033	7	5	5	4	3	2	16	5	5	10	12	6	7	10	14	6.92857	3.83234	1.02424
	0.055	8	10	10	12	6	4	12	8	10	13	22	6	12	13	14	10.4286	4.36268	1.16597
	0.077	13	13	14	11	9	3	19	3	18	18	19	13	20	16	14	13.5	5.52964	1.47786
	0.099	21	10	11	8	8	10	9	1	16	18	32	8	29	29	14	15	9.49494	2.53763
	0.121	23	18	17	10	11	4	5	1	9	22	31	13	27	27	14	15.5714	9.46015	2.52833
	0.143	16	21	24	13	11	8	10	0	15	26	25	15	51	30	14	18.9286	12.288	3.2841
	0.165	17	14	27	18	8	7	3	5	17	22	41	14	43	29	14	18.9286	12.4311	3.32236
	0.187	17	21	31	14	17	11	8	6	30	40	39	20	64	36	14	25.2857	15.8329	4.23153
	0.209	13	23	32	15	14	9	11	10	25	42	38	17	65	27	14	24.3571	15.7265	4.2031
vesicle count	0.231	22	14	20	22	13	12	18	9	23	24	41	32	60	38	14	24.8571	13.8278	3.69564
	0.253	8	15	25	7	21	27	23	15	26	36	46	29	69	32	14	27.0714	16.031	4.28448
	0.275	15	15	24	15	16	18	22	16	22	27	38	39	62	24	14	25.2143	13.2094	3.53037
	0.297	15	20	14	14	15	14	17	17	27	31	28	26	64	32	14	23.8571	13.3524	3.56857
	0.319	8	14	15	17	9	18	25	13	26	23	27	28	67	20	14	22.1429	14.4534	3.86284
	0.341	14	16	8	12	17	15	22	20	36	29	27	39	55	17	14	23.3571	12.7738	3.41395
	0.363	13	8	2	12	13	22	26	31	34	25	34	42	58	21	14	24.3571	14.8614	3.97189
	0.385	7	8	3	9	23	26	15	21	37	21	37	44	55	14	14	22.8571	15.4315	4.12425
	0.407	6	12	3	10	12	23	10	30	40	23	36	52	62	7	14	23.2857	18.3824	4.9129
	0.429	8	11	4	7	15	26	4	50	30	17	53	48	47	3	14	23.0714	19.0847	5.1006
	0.451	7	5	1	13	12	13	6	34	44	26	60	51	52	1	14	23.2143	20.9805	5.60727
	0.473	11	2	1	11	12	16	2	45	39	16	44	37	40	1	14	19.7857	17.2724	4.61624
	0.495	5	12	2	11	8	1	3	40	35	29	48	37	37		13	20.6154	17.2024	4.77109
Figure 6C, top	0.011	1	0	1	3	1	0	5	3	1	0	8	3	1	6	14	2.35714	2.46848	0.65973
	0.033	8	5	6	7	4	2	21	8	6	10	20	9	8	16	14	9.28571	5.74361	1.53504
	0.055	16	15	16	19	10	6	33	16	16	23	42	15	20	29	14	19.7143	9.41708	2.51682
	0.077	29	28	30	30	19	9	52	19	34	41	61	28	40	45	14	33.2143	13.7403	3.67226
	0.099	50	38	41	38	27	19	61	20	50	59	93	36	69	74	14	48.2143	21.3007	5.69285
	0.121	73	56	58	48	38	23	66	21	59	81	124	49	96	101	14	63.7857	29.3236	7.83706
	0.143	89	77	82	61	49	31	76	21	74	107	149	64	147	131	14	82.7143	39.3044	10.5045
	0.165	106	91	109	79	57	38	79	26	91	129	190	78	190	160	14	101.643	50.7006	13.5503
	0.187	123	112	140	93	74	49	87	32	121	169	229	98	254	196	14	126.929	65.0556	17.3868
	0.209	136	135	172	108	88	58	98	42	146	211	267	115	319	223	14	151.286	79.3545	21.2084
cumulative # vesicles	0.231	158	149	192	130	101	70	116	51	169	235	308	147	379	261	14	176.143	91.8777	24.5554
	0.253	166	164	217	137	122	97	139	66	195	271	354	176	448	293	14	203.214	105.41	28.172
	0.275	181	179	241	152	138	115	161	82	217	298	392	215	510	317	14	228.429	116.605	31.164
	0.297	196	199	255	166	153	129	178	99	244	329	420	241	574	349	14	252.286	128.481	34.3379
	0.319	204	213	270	183	162	147	203	112	270	352	447	269	641	369	14	274.429	140.505	37.5515
	0.341	218	229	278	195	179	162	225	132	306	381	474	308	696	386	14	297.786	149.843	40.0472
	0.363	231	237	280	207	192	184	251	163	340	406	508	350	754	407	14	322.143	160.137	42.7984
	0.385	238	245	283	216	215	210	266	184	377	427	545	394	809	421	14	345	171.069	45.7202
	0.407	244	257	286	226	227	233	276	214	417	450	581	446	871	428	14	368.286	184.403	49.2837
	0.429	252	268	290	233	242	259	280	264	447	467	634	494	918	431	14	391.357	195.249	52.1824
	0.451	259	273	291	246	254	272	286	298	491	493	694	545	970	432	14	414.571	211.233	56.4543
	0.473	270	275	292	257	266	288	288	343	530	509	738	582	1010	433	14	434.357	222.528	59.4731
	0.495	275	287	294	268	274	289	291	383	565	538	786	619	1047		13	455.077	244.919	67.9282
Figure 6C, bottom	0.011	1864.97	0	2672.23	4858.7	2422.64	0	4399.58	4486.17	2256.55	0	11590.9	7303.16	1858.48	9350.75	14	3790.3	3531.36	943.796
black circles	0.033	6947.45	4406.66	6441.63	3572.67	3603.8	2689.9	8889.69	4204.23	5706.42	9600.67	9850.25	7232.67	6929.53	8676.05	14	6339.4	2379.47	635.94
	0.055	4960.53	5634.98	7622.01	6835.36	4329.18	3152.72	4620.7	4339.24	6929.7	7848.89	11701.5	4341.02	7425.4	7232.9	14	6212.44	2193.76	586.308
	0.077	5527.9	5101.2	7065.05	4355.83	4341.04	1556.2	5385.51	1139.9	8396.58	7485.08	7100.78	6284.55	8489.74	6211.43	14	5602.91	2229.93	595.975
	0.099	6512.66	2893.51	3949.75	2333.09	2764.02	3675.65	1959.6	281.39	5372.37	5475.97	8875.99	2769.34	8980.27	8313.62	14	4582.66	2744.96	733.62
	0.121	5435.96	4002.3	4567.2	2238.98	2857.7	1096.72	863.355	216.94	2280.51	5112.47	6640.24	3382.96	6373	5954.46	14	3644.48	2123.06	567.413
	0.143	2978.7	3701.99	5007.08	2305.98	2227.64	1699.34	1403.75	0	2971.14	4767.91	4262.14	3042.22	9483.51	5249.9	14	3507.24	2271.17	606.995
	0.165	2558.05	2005.26	4501.48	2592.72	1298.6	1186.05	349.245	701.995	2705.09	3265.62	5697.23	2275.59	6463.55	4126.25	14	2837.62	1817.66	485.79
	0.187	2110.83	2492.74	4225.36	1670.38	2261.6	1521.43	785.085	699.32	3919.44	4905.34	4502.85	2663.94	7939.03	4247.41	14	3138.91	1956.74	522.961
	0.209	1354.8	2299.75	3632.61	1506.94	1554.36	1035.45	922.525	983.21	2729.95	4327.35	3703.82	1889.54	6768.02	2684.66	14	2528.07	1638.52	437.913
vesicle density (#/um^3)	0.231	1951.89	1195.4	1920.24	1886.74	1222.85	1166.46	1305.16	756.583	2130.62	2106.95	3418.95	3013.19	5318.99	3227.9	14	2187.28	1212.03	323.93
assuming all space is diffusable	0.253	611.595	1106.54	2056.7	518.496	1695.1	2246.81	1456.36	1090.58	2069.06	2725.25	3319.36	2343.09	5270.99	2349.25	14	2061.37	1220.29	326.135
	0.275	998.416	965.634	1710.71	969.33	1120.43	1296.8	1227.12	1016.09	1520.28	1780.7	2396.26	2733.49	4123.85	1538.05	14	1671.23	887.378	237.162
	0.297	877.15	1133.42	872.986	796.248	919.932	881.755	841.704	951.162	1635.4	1797.19	1556.27	1595.88	3740.01	1805.79	14	1386.06	780.16	208.506
	0.319	414.257	703.823	825.156	857.542	487.416	999.537	1106.2	645.709	1391.69	1181.33	1332.72	1517.6	3467.22	1001.44	14	1137.97	747.652	199.818
	0.341	646.462	718.429	391.128	540.551	818.973	739.899	875.216	887.833	1715.21	1328.83	1191.49	1880.21	2538.16	760.441	14	1073.77	600.826	160.578
	0.363	538.641	322.788	87.4786	485.657	560.72	970.379	935.013	1237.31	1451.21	1028.31	1349.43	1812.83	2401.81	844.273	14	1001.85	620.146	165.741
	0.385	261.711	291.639	118.084	329.045	893.375	1031.59	490.014	757.688	1422.93	779.699	1327.84	1710.21	2055.2	508.623	14	855.545	588.871	157.382
	0.407	203.437	397.192	106.829	331.909	421.949	825.26	298.067	983.247	1393.22	774.696	1173.88	1829.61	2101.11	230.939	14	790.81	633.353	169.271
	0.429	247.119	332.058	129.48	211.868	479.729	847.735	109.226	1495.2	950.809	521.817	1577.19	1536.06	1451.12	90.2787	14	712.835	585.248	156.414
	0.451	197.814	138.216	29.5533	360.271	350.573	386.862	150.651	931.427	1274.35	730.303	1636.02	1490.8	1468.79	27.5606	14	655.227	591.974	158.212
	0.473	285.461	50.8161	27.0891	280.168	321.496	436.309	46.3322	1133.51	1036.22	412.81	1103.35	991.831	1037.57	25.3352	14	513.45	445.115	118.962
	0.495	119.573	281.204	49.8415	258.372	197.262	25.0799	64.3227	929.577	856.172	689.663	1110.68	912.826	884.457		13	490.695	408.049	113.172
			V = R2pr + 2r3p/3 + Rr2p2/2			volume of shell with width r surrounding AZ with radius R
	0.022	0.000536201	0.000628469	0.000374219	0.000617449	0.000412772	0.000352108	0.00113647	0.000668722	0.000443154	0.000560709	0.000690194	0.000410781	0.000538073	0.00064166	14	0.000572213	0.000198075	5.29377e-05
	0.044	0.00154376	0.00176311	0.00115042	0.00173706	0.00124523	0.00109563	0.00293631	0.001858	0.00131936	0.0016023	0.00190844	0.00124035	0.00154824	0.00179426	14	0.00162446	0.000465626	0.000124444
	0.066	0.0031565	0.00353774	0.00246241	0.00349263	0.00263117	0.00236438	0.00553332	0.00370164	0.00276242	0.00325859	0.00378854	0.00262252	0.00316432	0.0035916	14	0.00329056	0.000802787	0.000214554
	0.088	0.0055082	0.00608616	0.00444399	0.00601798	0.00470441	0.00429215	0.0090613	0.00633345	0.00490616	0.00566337	0.0064643	0.00469108	0.0055201	0.0061675	14	0.0057043	0.00120963	0.000323288
	0.11	0.0087327	0.00954218	0.00722898	0.00944691	0.00759875	0.00701276	0.0136541	0.00988724	0.00788436	0.00895046	0.0100695	0.00757986	0.0087494	0.00965575	14	0.0089995	0.0016862	0.000450656
	0.132	0.0129638	0.0140396	0.0109512	0.0139132	0.011448	0.01066	0.0194454	0.0144968	0.0118308	0.0132537	0.014738	0.0114226	0.012986	0.0141902	14	0.01331	0.00223252	0.000596666
	0.154	0.0183353	0.0197122	0.0157444	0.0195507	0.016386	0.0153677	0.0265692	0.020296	0.0168794	0.0187068	0.0206036	0.0163533	0.0183638	0.0199046	14	0.0187695	0.00284861	0.000761322
	0.176	0.0249809	0.0266939	0.0217424	0.0264933	0.0225464	0.0212697	0.0351592	0.0274185	0.0231639	0.0254436	0.0278001	0.0225055	0.0250165	0.0269327	14	0.0255119	0.00353448	0.000944629
	0.198	0.0330346	0.0351183	0.0290791	0.0348746	0.0300633	0.0284997	0.0453491	0.0359983	0.030818	0.033598	0.0364613	0.0300132	0.0330779	0.0354085	14	0.033671	0.00429013	0.00114659
	0.22	0.0426301	0.0451194	0.0378882	0.0448285	0.0390702	0.0371916	0.0572729	0.0461691	0.0399757	0.0433037	0.046721	0.0390101	0.0426819	0.0454656	14	0.0433806	0.00511559	0.0013672
	0.242	0.0539012	0.056831	0.0483035	0.0564889	0.0497011	0.0474791	0.0710643	0.0580646	0.0507707	0.0546946	0.058713	0.0496301	0.0539623	0.057238	14	0.0547745	0.00601084	0.00160646
cumulative volume (um^3)	0.264	0.0669818	0.0703868	0.0604589	0.0699894	0.0620897	0.0594962	0.0868572	0.0718188	0.0633368	0.0679044	0.0725711	0.0620069	0.0670528	0.0708593	14	0.0679864	0.00697589	0.00186439
assuming all space is diffusable	0.286	0.0820056	0.0859206	0.0744881	0.085464	0.0763699	0.0733765	0.104785	0.0875655	0.0778078	0.083067	0.0884291	0.0762744	0.0820872	0.0864635	14	0.0831503	0.00801076	0.00214096
	0.308	0.0991064	0.103566	0.0905251	0.103046	0.0926755	0.0892539	0.124982	0.105438	0.0943175	0.100316	0.106421	0.0925663	0.0991995	0.104184	14	0.1004	0.00911542	0.0024362
	0.33	0.118418	0.123458	0.108703	0.122871	0.11114	0.107262	0.147582	0.125571	0.113	0.119786	0.12668	0.111017	0.118523	0.124155	14	0.119869	0.0102899	0.00275009
	0.352	0.140074	0.145728	0.129157	0.14507	0.131898	0.127535	0.172719	0.148098	0.133988	0.141609	0.149341	0.131759	0.140193	0.146511	14	0.141692	0.0115342	0.00308264
	0.374	0.164209	0.170513	0.15202	0.169779	0.155082	0.150207	0.200526	0.173152	0.157417	0.165921	0.174537	0.154927	0.164341	0.171384	14	0.166001	0.0128483	0.00343385
	0.396	0.190956	0.197944	0.177425	0.197131	0.180827	0.175411	0.231138	0.200868	0.18342	0.192854	0.202401	0.180655	0.191102	0.19891	14	0.192932	0.0142322	0.00380372
	0.418	0.220449	0.228156	0.205508	0.22726	0.209267	0.203281	0.264687	0.23138	0.212131	0.222544	0.233069	0.209076	0.220611	0.229221	14	0.222617	0.0156859	0.00419224
	0.44	0.252823	0.261283	0.236401	0.260299	0.240535	0.233951	0.301308	0.26482	0.243683	0.255122	0.266673	0.240325	0.253	0.262451	14	0.255191	0.0172095	0.00459943
	0.462	0.288209	0.297458	0.270238	0.296383	0.274764	0.267554	0.341135	0.301323	0.27821	0.290724	0.303347	0.274535	0.288403	0.298735	14	0.290787	0.0188028	0.00502527
	0.484	0.326743	0.336815	0.307153	0.335645	0.31209	0.304226	0.384302	0.341023	0.315847	0.329482	0.343226	0.31184	0.326954	0.338206	14	0.329539	0.020466	0.00546977
	0.506	0.368559	0.379489	0.34728	0.37822	0.352645	0.344098	0.430942	0.384053	0.356726	0.371532	0.386443	0.352373	0.368788	0.380997	14	0.371582	0.022199	0.00593293
	0.022	0.000536201	0.000628469	0.000374219	0.000617449	0.000412772	0.000352108	0.00113647	0.000668722	0.000443154	0.000560709	0.000690194	0.000410781	0.000538073	0.00064166	14	0.000572213	0.000198075	5.29377e-05
	0.044	0.00100756	0.00113465	0.000776201	0.00111961	0.000832454	0.000743523	0.00179984	0.00118928	0.000876206	0.00104159	0.00121824	0.00082957	0.00101017	0.0011526	14	0.00105225	0.000267596	7.1518e-05
	0.066	0.00161273	0.00177463	0.00131199	0.00175558	0.00138594	0.00126875	0.00259701	0.00184364	0.00144306	0.00165629	0.0018801	0.00138216	0.00161607	0.00179734	14	0.00166609	0.00033724	9.01312e-05
	0.088	0.00235171	0.00254842	0.00198158	0.00252535	0.00207324	0.00192777	0.00352799	0.00263181	0.00214373	0.00240478	0.00267576	0.00206857	0.00235578	0.00257589	14	0.00241374	0.000406944	0.00010876
	0.11	0.00322449	0.00345602	0.00278499	0.00342893	0.00289434	0.00272061	0.00459277	0.00355379	0.0029782	0.00328709	0.00360523	0.00288877	0.0032293	0.00348825	14	0.0032952	0.000476682	0.000127399
	0.132	0.00423108	0.00449742	0.0037222	0.00446632	0.00384925	0.00364725	0.00579136	0.00460957	0.00394648	0.0043032	0.00466851	0.00384279	0.00423663	0.00453442	14	0.00431046	0.00054644	0.000146042
	0.154	0.00537148	0.00567263	0.00479321	0.00563751	0.00493796	0.0047077	0.00712376	0.00579916	0.00504857	0.00545312	0.00586559	0.00493061	0.00537776	0.00571439	14	0.00545953	0.000616212	0.00016469
	0.176	0.00664568	0.00698165	0.00599803	0.00694251	0.00616048	0.00590196	0.00858996	0.00712256	0.00628446	0.00673685	0.00719648	0.00615224	0.00665269	0.00702817	14	0.00674241	0.000685994	0.000183339
	0.198	0.00805369	0.00842447	0.00733666	0.00838132	0.00751681	0.00723002	0.01019	0.00857976	0.00765416	0.00815438	0.00866118	0.00750768	0.00806144	0.00847575	14	0.00815909	0.000755782	0.000201991
	0.22	0.0095955	0.0100011	0.0088091	0.00995393	0.00900695	0.00869189	0.0119238	0.0101708	0.00915767	0.00970572	0.0102597	0.00899692	0.00960399	0.0100571	14	0.00970958	0.000825576	0.000220644
	0.242	0.0112711	0.0117115	0.0104153	0.0116604	0.0106309	0.0102876	0.0137914	0.0118956	0.010795	0.0113909	0.011992	0.01062	0.0112803	0.0117723	14	0.0113939	0.000895373	0.000239299
volume of shell (um^3)	0.264	0.0130806	0.0135558	0.0121554	0.0135006	0.0123886	0.012017	0.0157928	0.0137542	0.0125661	0.0132098	0.0138581	0.0123768	0.0130905	0.0136214	14	0.013212	0.000965174	0.000257954
assuming all space is diffusable	0.286	0.0150238	0.0155338	0.0140292	0.0154746	0.0142802	0.0138803	0.0179281	0.0157466	0.014471	0.0151626	0.015858	0.0142675	0.0150345	0.0156042	14	0.0151639	0.00103498	0.000276609
	0.308	0.0171008	0.0176457	0.0160369	0.0175825	0.0163056	0.0158774	0.0201971	0.0178729	0.0165098	0.0172491	0.0179918	0.016292	0.0171123	0.0177208	14	0.0172496	0.00110478	0.000295265
	0.33	0.0193117	0.0198914	0.0181784	0.0198241	0.0184647	0.0180083	0.0226	0.0201329	0.0186823	0.0194695	0.0202593	0.0184502	0.0193238	0.0199712	14	0.0194691	0.00117459	0.000313922
	0.352	0.0216563	0.0222708	0.0204537	0.0221996	0.0207577	0.020273	0.0251366	0.0225268	0.0209886	0.0218237	0.0226606	0.0207423	0.0216692	0.0223554	14	0.0218225	0.0012444	0.000332579
	0.374	0.0241348	0.0247841	0.0228627	0.0247088	0.0231845	0.0226716	0.0278071	0.0250544	0.0234288	0.0243117	0.0251958	0.0231682	0.0241484	0.0248735	14	0.0243096	0.00131421	0.000351236
	0.396	0.0267471	0.0274312	0.0254056	0.0273519	0.0257451	0.0252039	0.0306114	0.0277159	0.0260028	0.0269335	0.0278648	0.0257279	0.0267614	0.0275253	14	0.0269305	0.00138402	0.000369894
	0.418	0.0294931	0.0302121	0.0280823	0.0301288	0.0284395	0.02787	0.0335495	0.0305112	0.0287105	0.0296891	0.0306675	0.0284214	0.0295082	0.030311	14	0.0296853	0.00145383	0.000388552
	0.44	0.032373	0.0331268	0.0308928	0.0330394	0.0312677	0.0306699	0.0366213	0.0334402	0.0315521	0.0325785	0.0336041	0.0312487	0.0323889	0.0332304	14	0.0325739	0.00152364	0.00040721
	0.462	0.0353867	0.0361753	0.0338371	0.0360839	0.0342297	0.0336037	0.039827	0.0365031	0.0345275	0.0356017	0.0366745	0.0342098	0.0354033	0.0362837	14	0.0355962	0.00159345	0.000425868
	0.484	0.0385342	0.0393576	0.0369152	0.0392622	0.0373255	0.0366712	0.0431665	0.0396998	0.0376367	0.0387587	0.0398786	0.0373047	0.0385515	0.0394708	14	0.0387524	0.00166326	0.000444526
	0.506	0.0418155	0.0426737	0.0401272	0.0425743	0.0405551	0.0398726	0.0466398	0.0430303	0.0408797	0.0420495	0.0432166	0.0405335	0.0418336	0.0427917	14	0.0420424	0.00173308	0.000463184
densities computing using voxels...
	0.011	1739.15	1878.29	2236.06	3183.54	2041.62	0	3640.09	4205.12	2236.06	1490.7	6058.99	5217.46	2184.05	4649.23	14	2911.45	1656.17	442.631
	0.033	5478.34	4899.88	5809.14	5290.95	3201.63	4618.74	5986.57	4308	6508.92	6355.11	9175.54	4558.95	6367.07	6567.44	14	5651.88	1412.29	377.45
	0.055	5305.9	4495.9	4342.86	4896.01	3726.76	2263	3791.57	5962.82	8107.71	6674.12	5397.38	7169.03	6508.92	5758.9	14	5314.35	1546.27	413.259
	0.077	4999.24	4067.16	4589.8	3318.53	7583.15	4268.83	4695.72	2387.65	8187.4	5328.47	6119.73	4802.44	7397.36	6508.92	14	5303.89	1670.6	446.486
	0.099	6020.15	3079.16	3572.83	2377.58	2633.11	6037.35	1836.96	2086.99	5156.08	5366.53	6273.63	4550.92	5431.19	5353.79	14	4269.73	1608.64	429.928
	0.121	5510.87	4822.63	3075.8	3304.9	3913.1	2714.29	1156.58	0	2894.62	4160.76	4095.95	4283.81	5290.95	5648.98	14	3633.8	1614.55	431.507
	0.143	2509.96	4655.24	5072.03	3521.79	3668.53	2268.46	2171.43	903.023	4220.87	4585.33	3311.51	3524.94	7977.82	4767.23	14	3797.01	1686.97	450.863
	0.165	3939.01	2912.07	3612.09	3594.81	2945.05	3802.2	1277.75	3276.08	4980.31	3801.63	3927.54	3738.98	5605.12	5217.46	14	3759.29	1070.94	286.221
	0.187	3612.09	3360.08	4046.83	2633.11	4230.38	3570.89	2691.81	2314.79	5883.27	4257.77	4844.35	3317.06	5398.45	3492.17	14	3832.36	1031.49	275.677
	0.209	4062.45	2542.52	4053.86	3895.07	2513.52	2392.72	2218.45	3247.04	4481	4258.65	4433.72	3970.64	6168.96	3957.07	14	3728.26	1068.27	285.507
vesicle density (#/um^3)	0.231	3247.04	2850.69	3049.99	3347.05	3903.53	3848.95	4074.38	2702.57	4677.73	2990.2	4067.16	4688.39	3900.6	5956.22	14	3807.46	886.341	236.885
within diffusable voxels	0.253	3695.7	2127.97	2727.8	3170.1	5134.27	4368.11	4402.24	3774.34	4049.37	4138.6	3464.8	3498.24	4223.13	3052.94	14	3701.97	774.704	207.048
	0.275	3096.08	2865.18	3424.65	2631.22	2928.29	4304.41	3118.93	2970.53	3889.09	2571.59	3734.71	4506.91	4265.8	4541.63	14	3489.22	705.921	188.665
	0.297	2328.45	2796.05	2550.39	3115.64	2707.07	2099.71	2722.16	3386.33	3349.3	3268.48	2461.07	3491.69	4123.72	5109.79	14	3107.85	789.756	211.071
	0.319	1861.74	2575.35	2366.06	3100.95	2810.4	3379.49	3685.81	3555.78	3226.07	3134.35	2944.68	3037.03	4990.96	3984.25	14	3189.49	751.959	200.969
	0.341	3462.28	3060.35	1478.97	1998.18	3691.96	2887.06	3996.36	3786.87	4521.8	3643.23	3026.01	4324.27	4039.33	3577.69	14	3392.45	849.418	227.017
	0.363	1878.29	2007.67	0	2920.78	3991.36	4119.05	2990.9	4235.64	4248.51	2905.93	3551.82	5229.57	3803.38	5602.84	14	3391.84	1444.49	386.055
	0.385	2279.47	2140.5	2471.43	1892.48	4312.39	3324.4	2493.3	2949	4644.74	3422.53	3014.3	3670.92	4099.74	4544.24	14	3232.82	920.707	246.069
	0.407	1023.59	2803.41	2645.47	2822.56	2313.16	4727.23	2221.63	3713.57	4103.05	2683.27	3700.19	5981.14	4601.43	2253.94	14	3256.69	1287.97	344.225
	0.429	2564.21	2616	1619.21	1605.37	3516.62	2944.51	1098.41	3213.8	3440.09	2718.22	3724.19	4752.54	3238.43	1235.72	14	2734.81	1044.2	279.074
	0.451	3213.8	1733.8	1998.18	3710.9	3089.29	3125.27	2573	2968.56	5571.19	2457.81	5660.37	4775.31	4809.85	1841.46	14	3394.91	1328.2	354.978
	0.473	3191.26	1299.85	929.845	4069.62	1615.23	2272.12	3306.84	4197.29	4461.22	2328.45	3843.94	3980.33	3268.89		13	2981.92	1178.25	326.787
	0.495	5076.45	3491.24	1381.09	4152.68	3612.09	690.547	911.79	3556.72	4014.47	3552.88	4019.68	3570.48	4120.95		13	3242.39	1356.28	376.165
Figure 6C, bottom	0.011	0.0765539	0.0826782	0.0984265	0.140133	0.0898676	0	0.160229	0.185101	0.0984265	0.0656176	0.266704	0.229662	0.0961375	0.204649	14	0.128156	0.0729013	0.0194837
red circles	0.033	0.241145	0.215682	0.255706	0.232896	0.140929	0.203307	0.263516	0.189629	0.286509	0.279738	0.403888	0.200675	0.280265	0.289085	14	0.248784	0.0621659	0.0166145
	0.055	0.233554	0.1979	0.191164	0.215512	0.164044	0.0996123	0.166897	0.262471	0.356884	0.29378	0.237581	0.315566	0.286509	0.253495	14	0.233926	0.0680637	0.0181908
	0.077	0.220056	0.179028	0.202033	0.146075	0.333794	0.187905	0.206696	0.105099	0.360392	0.234548	0.269378	0.211393	0.325616	0.286509	14	0.233466	0.0735361	0.0196534
	0.099	0.264994	0.135538	0.157268	0.104656	0.115904	0.265751	0.0808589	0.0918647	0.22696	0.236223	0.276152	0.200322	0.23907	0.235662	14	0.187945	0.0708091	0.0189245
	0.121	0.242577	0.212282	0.13539	0.145475	0.172246	0.119477	0.0509102	0	0.127415	0.183148	0.180295	0.188564	0.232896	0.248656	14	0.159952	0.0710692	0.018994
	0.143	0.110483	0.204914	0.22326	0.155022	0.161481	0.0998529	0.0955818	0.0397491	0.185794	0.201837	0.145766	0.15516	0.351167	0.209843	14	0.167136	0.074257	0.019846
	0.165	0.173387	0.128183	0.158997	0.158236	0.129635	0.167365	0.0562437	0.144206	0.219223	0.16734	0.172882	0.164582	0.246726	0.229662	14	0.165476	0.0471406	0.0125989
	0.187	0.158997	0.147904	0.178133	0.115904	0.186212	0.157183	0.118488	0.101892	0.258969	0.187418	0.213238	0.14601	0.237628	0.153718	14	0.168692	0.045404	0.0121347
	0.209	0.178821	0.111916	0.178442	0.171453	0.11064	0.105323	0.0976514	0.142928	0.197244	0.187457	0.195163	0.174779	0.271545	0.174182	14	0.16411	0.047023	0.0125674
vesicle volume fraction	0.231	0.142928	0.125481	0.134254	0.14733	0.171825	0.169423	0.179345	0.118961	0.205904	0.131622	0.179028	0.206373	0.171696	0.26218	14	0.167596	0.0390148	0.0104272
within diffusable voxels	0.253	0.162677	0.0936687	0.120072	0.139541	0.226	0.192275	0.193777	0.166138	0.178245	0.182172	0.152513	0.153985	0.185893	0.134384	14	0.162953	0.0341008	0.00911383
	0.275	0.136283	0.126119	0.150746	0.115821	0.128897	0.189471	0.137289	0.130756	0.17119	0.113196	0.164394	0.198385	0.187772	0.199913	14	0.153588	0.0310731	0.00830464
	0.297	0.102494	0.123076	0.112263	0.137144	0.119159	0.0924248	0.119824	0.149059	0.147429	0.143872	0.108331	0.153697	0.181517	0.224922	14	0.136801	0.0347634	0.0092909
	0.319	0.0819498	0.113361	0.104149	0.136497	0.123708	0.148758	0.162241	0.156518	0.142005	0.137967	0.129619	0.133684	0.219691	0.175378	14	0.140395	0.0330996	0.00884625
	0.341	0.152402	0.13471	0.065101	0.0879556	0.162512	0.127082	0.175911	0.16669	0.19904	0.160367	0.133199	0.190345	0.177803	0.157482	14	0.149329	0.0373896	0.00999279
	0.363	0.0826782	0.0883734	0	0.128567	0.175691	0.181312	0.131653	0.186444	0.18701	0.127913	0.156344	0.230195	0.167417	0.246625	14	0.149302	0.0635832	0.0169933
	0.385	0.100338	0.0942202	0.108787	0.083303	0.189822	0.146333	0.10975	0.129809	0.204452	0.150653	0.132683	0.161586	0.180462	0.200028	14	0.142302	0.0405276	0.0108315
	0.407	0.0450563	0.1234	0.116448	0.124243	0.10182	0.208083	0.0977914	0.163464	0.180608	0.118112	0.162875	0.263277	0.202545	0.0992139	14	0.143353	0.0566938	0.0151521
	0.429	0.112871	0.115151	0.0712743	0.0706651	0.154794	0.129611	0.0483498	0.141465	0.151425	0.11965	0.163931	0.209197	0.142549	0.0543936	14	0.12038	0.0459634	0.0122842
	0.451	0.141465	0.0763184	0.0879556	0.163346	0.135984	0.137568	0.113258	0.13067	0.245232	0.108188	0.249158	0.210199	0.211719	0.0810571	14	0.149437	0.0584647	0.0156254
	0.473	0.140473	0.0572168	0.0409298	0.179136	0.0710992	0.100014	0.14556	0.184756	0.196373	0.102494	0.169202	0.175206	0.14389		13	0.131258	0.051864	0.0143845
	0.495	0.223455	0.153677	0.0607928	0.182792	0.158997	0.0303964	0.0401351	0.156559	0.176709	0.15639	0.176938	0.157165	0.181396		13	0.142723	0.0597007	0.016558
Figure 6C, bottom	0.0025	0.0946502	0.00867052	0.015	0.0590164	0.0750408	0	0.13654	0.0368349	0.0641975	0.00225225	0.187296	0.104202	0.0359551	0.108247	14	0.0662788	0.0554334	0.0148152
blue line	0.0075	0.0977444	0.0399637	0.0431433	0.100254	0.0821842	0.0390879	0.148665	0.0611318	0.0736926	0.0205339	0.193295	0.141258	0.0793201	0.153461	14	0.0909811	0.0513727	0.0137299
	0.0125	0.148906	0.114432	0.0828157	0.145843	0.106305	0.0747029	0.156467	0.125905	0.0850394	0.081448	0.235868	0.194826	0.136336	0.232195	14	0.137221	0.0533183	0.0142499
	0.0175	0.187097	0.183079	0.120071	0.166263	0.12667	0.0841121	0.185125	0.205643	0.133978	0.170234	0.293418	0.249407	0.171271	0.277453	14	0.182416	0.0594516	0.0158891
	0.0225	0.221984	0.201149	0.182276	0.188172	0.124783	0.0885965	0.213434	0.227162	0.170129	0.212059	0.334252	0.267612	0.225316	0.29553	14	0.21089	0.0630412	0.0168485
	0.0275	0.244039	0.213101	0.203808	0.190601	0.121102	0.11336	0.243322	0.254872	0.193708	0.252586	0.339963	0.266893	0.253623	0.294809	14	0.227556	0.0613538	0.0163975
	0.0325	0.231572	0.220784	0.240076	0.185073	0.11285	0.14051	0.260457	0.274188	0.202213	0.263861	0.328189	0.254043	0.245357	0.288614	14	0.231985	0.0572271	0.0152946
	0.0375	0.248521	0.231988	0.242332	0.204221	0.116177	0.152475	0.261592	0.267997	0.220851	0.267705	0.307692	0.216789	0.242288	0.260748	14	0.231527	0.0491083	0.0131247
	0.0425	0.245052	0.229504	0.252353	0.210429	0.127189	0.174672	0.234203	0.254304	0.253288	0.249324	0.281319	0.204685	0.238906	0.267664	14	0.230206	0.0402269	0.0107511
	0.0475	0.239506	0.236684	0.249077	0.231139	0.135241	0.185326	0.217471	0.246764	0.26484	0.247404	0.282849	0.208203	0.247202	0.257541	14	0.232089	0.0368902	0.00985932
	0.0525	0.226891	0.250166	0.252765	0.234337	0.146882	0.176579	0.190996	0.213074	0.278112	0.254991	0.288204	0.233271	0.253831	0.251079	14	0.232227	0.0390306	0.0104314
vesicle volume fraction	0.0575	0.2259	0.252623	0.237191	0.228661	0.152782	0.185585	0.182451	0.1806	0.295628	0.27004	0.288954	0.2478	0.277022	0.240238	14	0.233248	0.0439314	0.0117412
within diffusable voxels	0.0625	0.221493	0.241315	0.2099	0.218405	0.186173	0.159725	0.183117	0.130491	0.32202	0.294193	0.288834	0.260292	0.297173	0.232397	14	0.231823	0.0562531	0.0150343
vesicle volume divided into 4.4 nm voxels	0.0675	0.219727	0.232995	0.207881	0.199461	0.210924	0.135063	0.175319	0.0833333	0.32625	0.300848	0.281511	0.264512	0.325722	0.232951	14	0.228321	0.0694341	0.018557
	0.0725	0.210534	0.211391	0.196278	0.176978	0.257625	0.13188	0.175168	0.0735858	0.308804	0.276332	0.26925	0.247556	0.323272	0.249908	14	0.22204	0.0684727	0.0183001
	0.0775	0.211901	0.182508	0.182075	0.156633	0.272571	0.163449	0.178481	0.0679751	0.306726	0.2454	0.253066	0.230473	0.322404	0.266341	14	0.217143	0.0677163	0.0180979
	0.0825	0.224697	0.164944	0.17217	0.141125	0.272637	0.190236	0.170291	0.057609	0.305758	0.218845	0.244223	0.194628	0.294676	0.2673	14	0.20851	0.0671464	0.0179456
	0.0875	0.241118	0.166803	0.155752	0.125108	0.256617	0.223597	0.155853	0.048953	0.296182	0.205097	0.239604	0.167105	0.284726	0.269428	14	0.202568	0.0694594	0.0185638
	0.0925	0.258645	0.170603	0.163553	0.127662	0.233618	0.241507	0.131457	0.0501319	0.286673	0.20027	0.242468	0.15741	0.288967	0.266974	14	0.201424	0.0703716	0.0188076
	0.0975	0.282293	0.185582	0.166699	0.126234	0.185451	0.241552	0.103431	0.0514304	0.258425	0.202412	0.243283	0.161516	0.27879	0.265348	14	0.196603	0.0701415	0.0187461
	0.1025	0.303643	0.199576	0.164704	0.128156	0.148361	0.231865	0.0866995	0.0585366	0.222736	0.211992	0.239399	0.176341	0.270688	0.256539	14	0.192803	0.0701215	0.0187408
	0.1075	0.292439	0.198955	0.159728	0.115867	0.133536	0.217134	0.0780048	0.0578687	0.186283	0.217472	0.228866	0.190577	0.269206	0.245205	14	0.185082	0.0691564	0.0184828
	0.1125	0.273318	0.204931	0.156494	0.123079	0.124709	0.168409	0.0703585	0.0622468	0.158443	0.216799	0.220315	0.201381	0.262781	0.231031	14	0.176735	0.0652863	0.0174485
	0.1175	0.253138	0.198297	0.164512	0.125065	0.144735	0.149356	0.0647957	0.0591876	0.147126	0.21386	0.202983	0.1959	0.282631	0.226708	14	0.17345	0.0645184	0.0172433
	0.1225	0.22924	0.191333	0.163965	0.13732	0.162639	0.131719	0.0655355	0.046521	0.142411	0.208938	0.192308	0.190812	0.290663	0.224625	14	0.169859	0.064151	0.0171451
	0.1275	0.198262	0.183448	0.163659	0.142165	0.174469	0.121746	0.0741343	0.0288993	0.145293	0.195524	0.181951	0.184928	0.293348	0.21997	14	0.164843	0.0633729	0.0169371
	0.1325	0.16504	0.185232	0.164573	0.151474	0.173104	0.136468	0.0847873	0.0382302	0.151408	0.185393	0.169996	0.167347	0.292932	0.218523	14	0.163179	0.0580403	0.0155119
	0.1375	0.139847	0.181833	0.175076	0.169791	0.164662	0.1367	0.0852148	0.0768551	0.163517	0.181818	0.158721	0.145742	0.299242	0.208964	14	0.163427	0.0530537	0.0141792
	0.1425	0.13202	0.178705	0.176808	0.169289	0.145916	0.130952	0.0899738	0.119422	0.169351	0.176145	0.155776	0.130055	0.296614	0.203093	14	0.162437	0.0486699	0.0130076
	0.1475	0.132071	0.174359	0.175	0.171619	0.142549	0.118802	0.0831661	0.148638	0.188286	0.165338	0.155922	0.134924	0.283832	0.203881	14	0.162742	0.0464172	0.0124055
	0.1525	0.129046	0.167561	0.174512	0.168216	0.135276	0.109159	0.075454	0.173524	0.1887	0.166556	0.163076	0.141538	0.257269	0.212512	14	0.1616	0.0440457	0.0117717
	0.1575	0.136983	0.157835	0.162946	0.159978	0.132969	0.110582	0.0678695	0.187766	0.188051	0.166513	0.171445	0.150259	0.246821	0.20903	14	0.160646	0.0429365	0.0114753
	0.1625	0.155928	0.156753	0.17259	0.145235	0.137515	0.109607	0.0644926	0.173469	0.195272	0.172652	0.18269	0.159609	0.241807	0.210785	14	0.162743	0.0428207	0.0114443
	0.1675	0.168491	0.147992	0.172968	0.139862	0.141725	0.124515	0.0649288	0.140772	0.209887	0.181303	0.185708	0.162419	0.241606	0.205162	14	0.163381	0.0429129	0.011469
	0.1725	0.165603	0.14378	0.185468	0.140149	0.139025	0.146936	0.0770533	0.0997464	0.21864	0.193504	0.189689	0.168882	0.243901	0.20836	14	0.165767	0.0454825	0.0121557
	0.1775	0.170021	0.15071	0.185471	0.147418	0.156392	0.166307	0.088615	0.0911477	0.218545	0.205277	0.192194	0.169455	0.246376	0.205276	14	0.170943	0.0441332	0.0117951
	0.1825	0.164349	0.152965	0.185468	0.157275	0.171024	0.182392	0.0956916	0.102417	0.221867	0.20616	0.190939	0.159365	0.251339	0.199484	14	0.174338	0.0418221	0.0111774
	0.1875	0.154589	0.149623	0.190977	0.152406	0.175005	0.174667	0.0979659	0.104198	0.210202	0.19203	0.183846	0.146731	0.255045	0.191871	14	0.16994	0.0406803	0.0108723
	0.1925	0.149158	0.145446	0.193257	0.149058	0.1762	0.152045	0.0974348	0.123222	0.203865	0.184674	0.175896	0.133587	0.25189	0.179414	14	0.165368	0.0382788	0.0102304
	0.1975	0.141838	0.147855	0.1953	0.139502	0.174477	0.14336	0.103798	0.141081	0.196317	0.185824	0.17161	0.123511	0.249587	0.172629	14	0.163335	0.0368242	0.00984168
	0.2025	0.151077	0.138661	0.190731	0.141667	0.179492	0.137558	0.113498	0.145671	0.18783	0.183784	0.168898	0.1232	0.248753	0.171449	14	0.163019	0.0347751	0.00929404
	0.2075	0.178512	0.141251	0.181388	0.138149	0.172672	0.137063	0.123758	0.147848	0.192324	0.180145	0.17429	0.141587	0.24081	0.171377	14	0.165798	0.0303314	0.00810641
	0.2125	0.195076	0.13979	0.173114	0.141613	0.15818	0.130091	0.138581	0.146289	0.198623	0.170819	0.175764	0.160288	0.225004	0.175826	14	0.166361	0.0269762	0.00720971
	0.2175	0.202457	0.137037	0.158565	0.141022	0.143264	0.134882	0.159323	0.133822	0.202289	0.166732	0.175618	0.178695	0.206788	0.183355	14	0.165989	0.0262363	0.00701195
	0.2225	0.215999	0.131405	0.145857	0.146508	0.142099	0.141185	0.167508	0.130023	0.202754	0.160656	0.173728	0.191913	0.192843	0.202684	14	0.167512	0.0292351	0.00781342
	0.2275	0.209736	0.119231	0.136043	0.150628	0.147229	0.156911	0.171708	0.130107	0.200027	0.152593	0.176858	0.20315	0.181669	0.215729	14	0.167973	0.0309955	0.00828389
	0.2325	0.186338	0.103432	0.134566	0.147986	0.156272	0.179492	0.166054	0.129766	0.196146	0.143413	0.176168	0.202468	0.179291	0.230306	14	0.16655	0.0332712	0.00889209
	0.2375	0.159437	0.097303	0.137614	0.144043	0.16284	0.193219	0.164455	0.140967	0.192098	0.151976	0.171341	0.195124	0.180676	0.2286	14	0.165692	0.0320065	0.0085541
	0.2425	0.142225	0.0949928	0.142203	0.133286	0.170401	0.211186	0.165629	0.149144	0.190659	0.163488	0.17171	0.182189	0.185084	0.217348	14	0.165682	0.0322224	0.00861179
	0.2475	0.127933	0.091754	0.143727	0.128783	0.17609	0.223348	0.162151	0.147864	0.196941	0.164577	0.165073	0.172232	0.191403	0.204122	14	0.164	0.0346618	0.00926375
	0.2525	0.130937	0.093644	0.138876	0.130511	0.17593	0.227126	0.161184	0.15512	0.190516	0.159058	0.167181	0.168989	0.20201	0.192364	14	0.163818	0.0339923	0.00908483
	0.2575	0.131527	0.0958775	0.128134	0.122849	0.172028	0.212527	0.160052	0.15217	0.177785	0.144762	0.165446	0.176948	0.199184	0.172432	14	0.15798	0.0313556	0.00838014
	0.2625	0.130511	0.101267	0.126421	0.114376	0.165688	0.196453	0.157647	0.149933	0.159998	0.130874	0.1628	0.176076	0.198299	0.166996	14	0.152667	0.0289216	0.00772961
	0.2675	0.13805	0.111009	0.125911	0.121095	0.161443	0.18223	0.155967	0.149357	0.152609	0.120743	0.158525	0.174884	0.192259	0.170574	14	0.151047	0.0248582	0.00664364
	0.2725	0.149988	0.121574	0.12626	0.130129	0.147606	0.171747	0.151099	0.143162	0.152885	0.114814	0.155011	0.17436	0.190911	0.178241	14	0.150556	0.0225745	0.00603329
	0.2775	0.149109	0.131112	0.124578	0.138074	0.142814	0.15844	0.140657	0.134498	0.152678	0.120029	0.144243	0.166822	0.185595	0.192469	14	0.148651	0.0212372	0.00567588
	0.2825	0.144969	0.142768	0.126167	0.133344	0.13524	0.154798	0.131611	0.127297	0.157349	0.13066	0.136117	0.158852	0.187452	0.197178	14	0.147414	0.021929	0.00586076
	0.2875	0.139716	0.147617	0.125592	0.132357	0.131318	0.149533	0.128193	0.132556	0.156072	0.137866	0.124409	0.149191	0.187344	0.20268	14	0.146032	0.0230992	0.00617353
	0.2925	0.127085	0.151369	0.123466	0.140915	0.140093	0.140546	0.134651	0.134681	0.153488	0.142384	0.120048	0.143387	0.189074	0.209225	14	0.146458	0.0245594	0.00656377
	0.2975	0.115337	0.149449	0.117259	0.149472	0.135468	0.135013	0.137205	0.136724	0.14767	0.147076	0.114924	0.13977	0.187443	0.215516	14	0.14488	0.0273526	0.00731028
	0.3025	0.100427	0.140532	0.111118	0.144177	0.131229	0.127339	0.144838	0.134667	0.142503	0.140078	0.111128	0.137484	0.191127	0.214144	14	0.140771	0.0299438	0.00800282
	0.3075	0.0829295	0.126342	0.111389	0.132787	0.124315	0.134934	0.141807	0.133735	0.13859	0.13384	0.112323	0.133705	0.194181	0.209363	14	0.136446	0.0316761	0.0084658
	0.3125	0.0778513	0.11498	0.114786	0.125898	0.123036	0.13528	0.157817	0.130383	0.141342	0.131409	0.115261	0.135412	0.201928	0.199032	14	0.13603	0.0326413	0.00872374
	0.3175	0.0870179	0.114525	0.111052	0.12515	0.121408	0.129591	0.160912	0.132517	0.150467	0.133474	0.119644	0.137539	0.210512	0.193333	14	0.137653	0.0325502	0.00869942
	0.3225	0.103808	0.116791	0.102571	0.126857	0.135505	0.129387	0.157964	0.140525	0.159412	0.137412	0.129462	0.138654	0.211439	0.17639	14	0.140441	0.0288222	0.00770306
	0.3275	0.121659	0.124053	0.0940929	0.113557	0.14695	0.125403	0.149115	0.150073	0.172449	0.139822	0.132262	0.149068	0.206936	0.173347	14	0.142771	0.0284515	0.00760399
	0.3325	0.132741	0.125752	0.078532	0.10519	0.151779	0.126413	0.140832	0.168682	0.181923	0.139046	0.133081	0.160396	0.196577	0.164084	14	0.143216	0.0306982	0.00820443
	0.3375	0.141912	0.128694	0.0691381	0.0942062	0.159307	0.125475	0.139513	0.183452	0.186765	0.138336	0.136561	0.171536	0.184727	0.171081	14	0.14505	0.0345605	0.00923668
	0.3425	0.144158	0.127648	0.06231	0.0938856	0.159184	0.135275	0.144897	0.198241	0.180115	0.139613	0.14457	0.182617	0.175543	0.17822	14	0.147591	0.0366923	0.00980643
	0.3475	0.136315	0.120082	0.0536531	0.0951094	0.147933	0.143283	0.156982	0.193916	0.172054	0.137943	0.149128	0.182151	0.170135	0.190328	14	0.146358	0.0381466	0.0101951
	0.3525	0.126476	0.109438	0.0500772	0.095106	0.139729	0.157286	0.155072	0.188032	0.168586	0.140254	0.149487	0.178446	0.171279	0.206742	14	0.145429	0.040627	0.010858
	0.3575	0.112913	0.0952462	0.0437061	0.102044	0.12935	0.160515	0.159208	0.173113	0.166255	0.137821	0.149411	0.180517	0.173793	0.215042	14	0.142781	0.0434465	0.0116116
	0.3625	0.105114	0.0866486	0.0352021	0.103784	0.147481	0.156503	0.157875	0.162518	0.165652	0.14399	0.150393	0.176204	0.182508	0.21954	14	0.142387	0.046126	0.0123277
	0.3675	0.100061	0.0859467	0.0362525	0.114375	0.17517	0.152343	0.153572	0.145902	0.170486	0.143714	0.149087	0.174716	0.185012	0.21497	14	0.142972	0.0458252	0.0122473
	0.3725	0.098281	0.088249	0.0462392	0.12141	0.190387	0.150723	0.137687	0.135784	0.174221	0.143949	0.146871	0.177211	0.182532	0.206237	14	0.142842	0.0437951	0.0117047
	0.3775	0.0873119	0.0958771	0.0575793	0.115337	0.207577	0.160076	0.12572	0.130953	0.181452	0.142709	0.14175	0.180519	0.173667	0.19755	14	0.14272	0.0439336	0.0117418
	0.3825	0.0862505	0.100961	0.0641335	0.108792	0.215008	0.164166	0.11146	0.127434	0.185422	0.136808	0.137816	0.192551	0.172461	0.176022	14	0.141377	0.0442804	0.0118344
	0.3875	0.0799858	0.100384	0.0789742	0.103706	0.199345	0.177909	0.102613	0.131668	0.1864	0.130143	0.141237	0.206632	0.177072	0.164379	14	0.14146	0.0440881	0.011783
	0.3925	0.0755236	0.104516	0.0888938	0.097509	0.184549	0.186647	0.101681	0.144071	0.183827	0.118514	0.145765	0.21599	0.182249	0.144999	14	0.141052	0.0442578	0.0118284
	0.3975	0.069508	0.120096	0.101034	0.0990606	0.167013	0.183774	0.102723	0.152103	0.177946	0.113586	0.142035	0.219652	0.187326	0.133424	14	0.140663	0.0425211	0.0113642
	0.4025	0.0698231	0.131884	0.0908632	0.102078	0.149528	0.180956	0.100783	0.16115	0.167899	0.110642	0.14292	0.221343	0.188495	0.124118	14	0.138749	0.0424665	0.0113497
	0.4075	0.0631287	0.136677	0.0848501	0.104606	0.142766	0.17458	0.0915918	0.159616	0.162232	0.114517	0.146158	0.221132	0.187588	0.0993062	14	0.134911	0.0442614	0.0118294
	0.4125	0.0618633	0.144756	0.0942826	0.104878	0.14469	0.16793	0.081406	0.154435	0.15888	0.110706	0.152785	0.222462	0.186637	0.0892412	14	0.133925	0.0449856	0.0120229
	0.4175	0.0629364	0.157132	0.105892	0.107287	0.142058	0.162964	0.0673085	0.148907	0.16432	0.108466	0.160322	0.214316	0.177558	0.079166	14	0.13276	0.0449444	0.0120119
	0.4225	0.0735048	0.154066	0.110732	0.100782	0.149987	0.160329	0.0570511	0.13964	0.162758	0.10861	0.165506	0.209594	0.166866	0.0779129	14	0.131238	0.0437711	0.0116983
	0.4275	0.0946541	0.148877	0.122002	0.0970913	0.147847	0.145566	0.0510867	0.130438	0.172172	0.112896	0.174206	0.200389	0.158803	0.0773135	14	0.130953	0.0412436	0.0110228
	0.4325	0.109614	0.126097	0.123634	0.10374	0.143427	0.136358	0.0505454	0.128287	0.187263	0.119059	0.175462	0.205678	0.157306	0.0739326	14	0.131458	0.0418328	0.0111803
	0.4375	0.115229	0.11044	0.125498	0.112265	0.135307	0.130913	0.0602007	0.127921	0.203237	0.122414	0.183424	0.207056	0.166211	0.0731393	14	0.133804	0.0433195	0.0115776
	0.4425	0.126032	0.0943699	0.108581	0.123328	0.136317	0.123643	0.0776	0.129381	0.203966	0.123389	0.186373	0.208974	0.177255	0.0714286	14	0.135045	0.0437225	0.0116853
	0.4475	0.123826	0.0736168	0.0754302	0.134299	0.132189	0.118047	0.0979567	0.132301	0.202763	0.127975	0.19065	0.203186	0.184491	0.0729404	14	0.133548	0.0462229	0.0123536
	0.4525	0.134581	0.0586503	0.0503259	0.144705	0.13002	0.12002	0.109049	0.137846	0.199365	0.13097	0.193901	0.196501	0.18569	0.0652564	14	0.132634	0.0502226	0.0134226
	0.4575	0.135446	0.0544548	0.0344222	0.151393	0.120571	0.116421	0.115003	0.143193	0.19343	0.124396	0.192001	0.19048	0.185841	0.0486334	14	0.128977	0.0535527	0.0143126
	0.4625	0.141081	0.0505884	0.0274631	0.152665	0.118486	0.126439	0.112368	0.152008	0.184631	0.113845	0.184144	0.186829	0.183622	0.0470424	14	0.127229	0.0536753	0.0143453
	0.4675	0.148148	0.0568479	0.024349	0.157478	0.114988	0.131266	0.0983229	0.161448	0.181008	0.100732	0.177698	0.182685	0.17303	0.0504202	14	0.125601	0.0527986	0.014111
	0.4725	0.155344	0.0609246	0.0287337	0.14655	0.108341	0.121664	0.0896691	0.165602	0.179096	0.0971423	0.172524	0.181764	0.160973	0.0548862	14	0.123087	0.0506005	0.0135235
	0.4775	0.166133	0.0749712	0.0331695	0.154708	0.104413	0.100088	0.0785279	0.164346	0.181822	0.10657	0.170685	0.176699	0.151117	0.061309	14	0.123183	0.049055	0.0131105
	0.4825	0.171737	0.0979341	0.0416429	0.161655	0.108017	0.0784716	0.0760049	0.158379	0.184229	0.110632	0.1697	0.171359	0.148363	0.0541977	14	0.123737	0.0484968	0.0129613
	0.4875	0.158617	0.123118	0.049866	0.158402	0.105466	0.0566895	0.0799695	0.151136	0.180902	0.120594	0.168993	0.173618	0.149046	0.0220264	14	0.121317	0.0512074	0.0136858
	0.4925	0.151062	0.139419	0.0594663	0.165057	0.10087	0.0406144	0.0888765	0.148505	0.181285	0.130358	0.170141	0.180049	0.154093		13	0.131523	0.0455567	0.0126352
	0.4975	0.151551	0.158612	0.077054	0.173882	0.0969634	0.0399726	0.0886547	0.149098	0.179321	0.132747	0.166062	0.17787	0.152061		13	0.134142	0.0443266	0.012294
	0.5025	0.165308	0.162212	0.087806	0.179537	0.100357	0.042407	0.0750679	0.153461	0.184256	0.131482	0.153562	0.17434	0.154411		13	0.135708	0.0449788	0.0124749
