# Supplementary material for: Physical determinants of vesicle mobility and supply at a central synapse
Source: eLife. 2016 Aug 19;5:e15133. doi: 10.7554/eLife.15133 (PMC5025287; doi:10.7554/eLife.15133)
Supplement: Figure 7—source data 1. — DOI: http://dx.doi.org/10.7554/eLife.15133.024 [file elife-15133-fig7-data1.xlsx]

## Sheet: Sheet1
Physical determinants of vesicle mobility and supply at a central synapse									C-1ms	connectors/tethers with 1 ms lifetime
Rothman et al. 2016									C-100ms	connectors/tethers with 100 ms lifetime
Figures 7 & 8									HI	hydrodynamic interactions
Source data									SI	steric interactions
Title: Vesicle supply rates and pool sizes computed from Monte Carlo AZ simulations
									Release site simulations (Figure 8)
Figure 7: Control, C-ms, C-100ms, No HI, No HI or SI, Open									1RS	1 release site
Figure 7-supplement 3: Ctrl dr=0									2RS	2 release sites
Figure 8: Ctrl 1RS, Ctrl 2RS, Open 1RS									Release probability = 0.5
									Total time for docking and priming = 16.7 ms
vesicle step dr = 5 nm, except last column
Ctrl dr=0, computed via linear extrapolation
each data point is the average of 14 AZ simulations, and each AZ is the average of 20 Monte Carlo simulations
	EM series #	AZ #	Control	C-1ms	C-100ms	No HI	No HI or SI	Open	Ctrl 1RS	Ctrl 2RS	Open 1RS	Ctrl dr=0
Figure 7D	1	1	875	600	775	1225	1300	875	225	400	75	1696.43
	3	1	900	650	625	1850	1250	900	350	475	350	1553.57
	4	1	400	350	375	650	1000	300	400	425	300	710.714
AZ supply rate	4	2	1000	850	850	1500	1625	950	400	425	400	2360.71
vesicles/s	4	3	275	300	425	875	550	325	275	400	200	1742.86
	4	4	25	0	0	325	150	0	0	0	0	25
0 - 2 ms	5	1	3825	3275	3300	5275	4975	3200	350	500	250	4342.86
	10	1	925	525	475	2050	2075	1150	275	675	275	2044.74
	10	2	200	100	125	725	350	175	225	350	300	1128.57
	10	3	550	575	450	2050	1525	825	225	200	175	1717.86
	10	4	1550	1450	1350	3150	3850	1800	300	425	300	4321.43
	10	5	425	450	300	1150	1050	525	175	325	175	2264.29
	16	1	700	625	575	1475	1575	700	50	550	275	1485.71
	18	1	3075	2800	2950	4300	4100	3150	100	250	125	3960.71
	COUNT		14	14	14	14	14	14	14	14	14	14
	AVERAGE		1051.79	896.429	898.214	1900	1812.5	1062.5	239.286	385.714	228.571	2096.82
	STDEV		1098.31	974.475	1000.74	1430.27	1466.18	1002.72	123.924	162.526	110.007	1295.47
	SEM		293.537	260.439	267.46	382.256	391.853	267.989	33.1201	43.437	29.4007	346.228
	EM series #	AZ #	Control	C-1ms	C-100ms	No HI	No HI or SI	Open	Ctrl 1RS	Ctrl 2RS	Open 1RS	Ctrl dr=0
Figure 7E	1	1	65.7917	79.0833	27.1667	182.958	131.375	50.9583	25.4167	63.3333	35.4167	109.435
	3	1	101.083	79	64.2083	145.167	159.917	86.8333	30.4167	71.6667	41.25	69.0714
	4	1	67.375	56.6667	31.625	136.875	130.458	48.625	17.5	35.8333	20.4167	67.4167
AZ supply rate	4	2	73.6667	87.0833	47.3333	109.708	158.083	57.4583	37.9167	65.4167	35.4167	110.173
vesicles/s	4	3	70.6667	48.4167	23.9167	114.125	91.25	47.0417	27.0833	54.5833	31.25	76.5298
	4	4	31.5833	26.2083	9.5	42.875	50.0833	32.7083	16.6667	29.5833	10	45.8155
100 ms	5	1	114.917	128.583	116.917	150.417	168.167	127.708	42.0833	83.75	36.6667	165.625
	10	1	45.375	44.5833	50.0833	47.4167	52.4583	82.9167	32.9167	72.9167	30	43.9781
	10	2	58.2083	28.25	19.0417	112.625	173.5	40.7917	17.0833	23.3333	25.4167	56.6131
	10	3	98.3333	115.583	68.4167	225.625	185.917	90.9167	33.3333	71.6667	32.5	139.946
	10	4	108.708	124	71.2917	229.833	268.042	104.25	31.25	72.9167	42.0833	128.631
	10	5	50.8333	29.4583	10.2083	83.4167	114.833	56.7083	28.3333	65.8333	34.1667	56.0238
	16	1	114.375	76.875	24.5	219.708	234.333	131	27.0833	60	30	154.774
	18	1	154.167	181.375	72.0833	270.208	255.875	131.458	42.9167	82.5	18.3333	124.905
	COUNT		14	14	14	14	14	14	14	14	14	14
	AVERAGE		82.5059	78.9404	45.4494	147.926	155.307	77.8124	29.2857	60.9524	30.2083	96.3527
	STDEV		33.7132	45.4108	30.4439	69.8147	67.432	35.0372	8.4644	18.8537	8.98383	41.8869
	SEM		9.01023	12.1365	8.13647	18.6588	18.022	9.3641	2.26221	5.03886	2.40103	11.1947
	EM series #	AZ #	Control	C-1ms	C-100ms	No HI	No HI or SI	Open	Ctrl 1RS	Ctrl 2RS	Open 1RS	Ctrl dr=0
Figure 7H	1	1	6.11567	7.17813	5.8922	12.235	31.0649	37.0786	6.11911	6.06037	23.5845	6.92061
	3	1	5.83013	6.29092	6.46202	11.5488	28.0618	57.1498	6.16643	6.28942	29.2945	7.40447
	4	1	11.8466	13.5465	12.1376	20.9079	38.7012	44.9136	12.2593	12.0847	25.7762	12.5864
AZ supply rate	4	2	5.58301	5.65653	5.59525	10.6632	19.78	53.9198	5.26433	5.44083	27.6493	6.38668
vesicles/s	4	3	5.37859	5.59785	5.16658	10.3101	20.4997	46.7971	5.32747	5.28421	26.5036	5.68059
	4	4	6.82367	7.08239	5.92501	13.3598	23.007	27.0481	7.09133	6.57799	20.0471	8.04185
50-100 s	5	1	6.4575	5.96025	6.33201	11.5379	23.9627	93.8974	5.43794	5.55347	33.172	6.23535
	10	1	4.37361	4.55239	4.60758	8.09377	11.9291	77.8958	4.39898	4.25829	32.0475	4.55374
	10	2	5.6177	6.47166	5.72092	10.2752	17.9237	25.0459	5.81058	5.76758	19.0279	6.14876
	10	3	5.30607	5.46341	5.77389	9.63218	15.8654	58.7594	5.32826	5.43172	29.4362	5.97093
	10	4	6.35453	6.5054	6.33039	11.7917	18.1672	75.0457	6.11876	6.0892	30.9545	7.11727
	10	5	8.42944	9.10101	6.7834	15.2558	30.3207	48.4382	8.14906	8.45683	26.5419	9.37148
	16	1	7.864	7.79513	8.67416	12.5665	29.9921	54.9806	7.95238	7.49074	27.814	9.32325
	18	1	13.1547	13.3747	13.6594	24.343	41.4798	65.7452	13.1054	13.1429	30.5479	14.0411
	COUNT		14	14	14	14	14	14	14	14	14	14
	AVERAGE		7.08109	7.46973	7.07574	13.0372	25.054	54.7654	7.03781	6.99487	27.3141	7.84161
	STDEV		2.53096	2.76961	2.64977	4.45842	8.60346	19.1863	2.61098	2.59156	4.18988	2.68369
	SEM		0.676429	0.74021	0.708181	1.19156	2.29937	5.12775	0.697814	0.692624	1.11979	0.717247
	EM series #	AZ #	Control	C-1ms	C-100ms	No HI	No HI or SI	Open	Ctrl 1RS	Ctrl 2RS	Open 1RS	Ctrl dr=0
Figure 7I	1	1	113.794	128.379	109.688	190.301	356.223	8.02802	131.437	121.944	1.71827	158.592
	3	1	180.888	181.912	167.81	244.524	359.695	1.03361	168.573	176.593	0.00676383	172.852
	4	1	172.802	209.915	134.49	296.389	520.771	12.7299	138.774	168.099	2.87435	176.785
Pool size	4	2	155.57	165.209	152.778	175.015	245.991	3.23563	147.041	142.512	2.87573	153.221
# vesicles	4	3	121.633	122.004	98.8275	156.032	179.839	4.22186	118.505	117.688	0.858683	151.464
	4	4	71.1299	61.0068	19.1736	120.837	164.085	4.26478	60.0575	68.156	-0.933433	74.4376
linear back extrapolation	5	1	147.228	150.217	164.349	206.561	276.982	43.8636	158.639	166.445	3.88915	171.337
	10	1	229.624	245.835	235.148	263.605	253.409	8.52774	228.86	240.659	0.0531494	224.401
	10	2	306.156	276.587	144.278	344.153	459.246	15.0416	263.665	283.856	7.24712	224.251
	10	3	372.011	399.729	374.162	418.918	465.732	18.1531	348.842	378.252	1.04599	338.992
	10	4	421.408	481.768	428.122	487.808	593.609	23.7075	409.126	465.93	-0.379086	462.462
	10	5	154.681	185.376	95.9346	273.905	352.304	20.7854	141.652	184.188	3.36426	197.517
	16	1	616.057	663.979	449.122	708.968	740.781	32.2802	523.729	600.433	5.51815	637.738
	18	1	250.277	290.523	243.314	465.799	743.763	26.9623	197.874	238.078	-0.066265	286.465
	COUNT		14	14	14	14	14	14	14	14	14	14
	AVERAGE		236.661	254.46	201.228	310.915	408.031	15.9168	216.912	239.488	2.0052	245.037
	STDEV		148.238	162.684	130.495	161.423	188.84	12.5355	128.649	148.749	2.40929	147.859
	SEM		39.6183	43.4792	34.8764	43.1422	50.4696	3.35025	34.3828	39.7548	0.643909	39.5171

## Sheet: Sheet2
1696.43	1553.57	710.714	2360.71	1742.86	25	4342.86	2044.74	1128.57	1717.86	4321.43	2264.29	1485.71	3960.71
1696.43
1553.57
710.714
2360.71
1742.86
25
4342.86
2044.74
1128.57
1717.86
4321.43
2264.29
1485.71
3960.71
