# Supplementary material for: Physical determinants of vesicle mobility and supply at a central synapse
Source: eLife. 2016 Aug 19;5:e15133. doi: 10.7554/eLife.15133 (PMC5025287; doi:10.7554/eLife.15133)
Supplement: Table 1—source data 1. — DOI: http://dx.doi.org/10.7554/eLife.15133.010 [file elife-15133-table1-data1.xlsx]

## Sheet: Axelrod Fits
"Physical determinants of vesicle mobility and supply at a central synapse"
Rothman et al. 2016
Table 1
Source data
Title: Fits of Axelrod equation to FRAP curves
see Methods, Equation (2)
fixed parameters
w	0.23	computed from PSFi
gammaD	1.1	Fig 7 of Axelrod
	um^2/s									s		C		measured from fit					Fit with TauHalf as variable instead of D
Expt	D	1 STDV	K	1 STDV	Finf	1 STDV		Fbleach	%Recov	TauHalf		Temp		TauHalf	1 STDV+	1 STDV-	1 STDV		TauHalf	1 STDV			Q10
Control 35C drift corrected	0.024929	0.00335	0.96697	0.0287	0.88317	0.00443		0.640937	67.4626	0.583557		35		0.59259	0.09135	0.069823	0.0805865		0.58355	0.0784
Control 35C	0.018067	0.00469	0.94247	0.053	0.91728	0.0109		0.647592	76.5272	0.805197		35		0.795652	0.278958	0.163976	0.221467		0.80528	0.0992			1.4776
21C	0.010459	0.00178	1.171	0.0225	0.8887	0.0128		0.589192	72.9071	1.39091		21		1.37442	0.281883	0.199892	0.240887		1.391	0.236
CD+LB	0.03155	0.00328	0.88787	0.0239	0.93213	0.00373		0.662787	79.8733	0.461094		35		0.455627	0.0528639	0.0429069	0.0478854		0.4611	0.0479
Jaspla 2uM	0.015183	0.002	1.0094	0.0242	0.91243	0.00762		0.629644	76.3552	0.958144		35		0.946785	0.143637	0.1102	0.126918		0.95815	0.126
Jaspla 5uM	0.01032	0.00109	0.98589	0.0195	0.94258	0.00664		0.635865	84.2311	1.40964		35		1.39293	0.164496	0.133067	0.148782		1.4097	0.149
OA	0.11997	0.0182	0.73953	0.0465	0.95637	0.00319		0.706749	85.122	0.121259		35		0.119822	0.0214283	0.0157831	0.0186057		0.12123	0.0184
Roscovitine	0.020274	0.00297	0.85933	0.0257	0.92305	0.00603		0.670935	76.6156	0.717545		35		0.709039	0.121697	0.0905976	0.106147		0.7173	0.105
